# Supplementary material for: A novel method of alkoxyamine homolysis activation via photochemical rearrangement
Source: Royal Society of Chemistry journal article supplement (doi:10.1039/d3cp05815h), 2024-01-01
Supplement: d3cp05815h1.pdf [file d3cp05815h1.pdf]

## Supporting information

for

### A novel method of alkoxyamines homolysis activation via photochemical rearrangement

Sergey Cherkasov<sup>a</sup>, Dmitry Parkhomenko<sup>b</sup>, Denis Morozov<sup>b</sup>, Elena Bagryanskaya<sup>b</sup>

<sup>a</sup> Novosibirsk State University, Pirogova 2, 630090, Novosibirsk

<sup>b</sup> Novosibirsk Institute of Organic Chemistry SB RAS, Lavrentieva av. 9, 630090, Novosibirsk

## TABLE OF CONTENTS

|                                                                          |    |
|--------------------------------------------------------------------------|----|
| SECTION 1. INTERACTION BETWEEN 5 AND THIOPHENOL.....                     | 2  |
| SECTION 2. QUANTUM YIELD OF STUDIED PHOTOCHEMICAL PROCESSES. ....        | 3  |
| SECTION 3. NMR SPECTRA OF STUDIED OXAZIRIDINE-CONTAINING COMPOUNDS. .... | 5  |
| SECTION 4. PURIFICATION OF ALKOXYAMINE 4A BY VACUUM DRYING.....          | 19 |
| SECTION 5. OPTIMIZED GEOMETRIES OF CALCULATED COMPOUNDS. ....            | 20 |

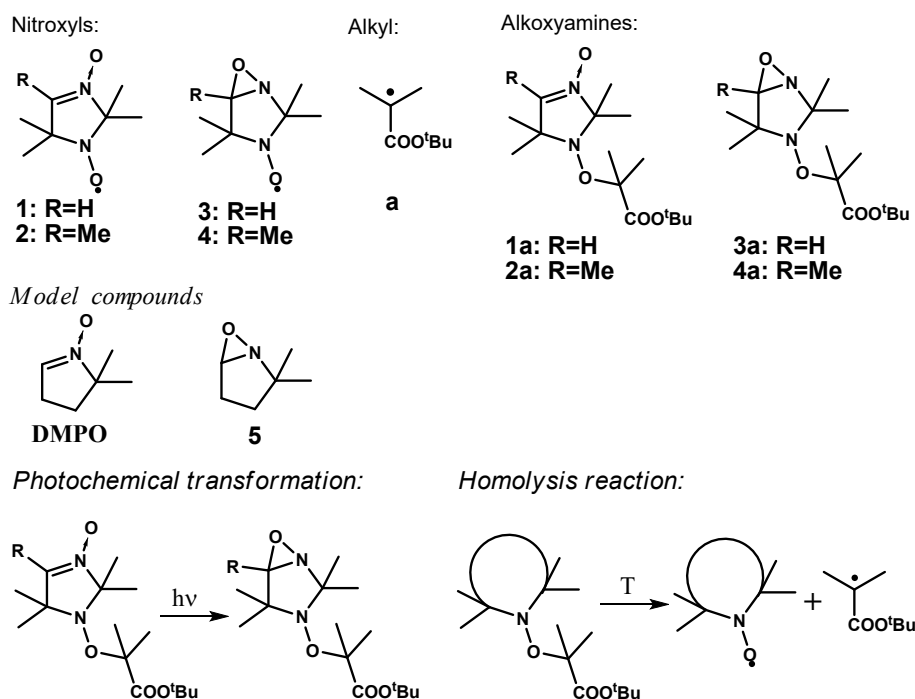

Scheme 1SI – Compounds and reactions under study.

## SECTION 1. INTERACTION BETWEEN 5 AND THIOPHENOL.

Oxaziridines are strong oxidants, which are readily to react with wide range of reducing agents, e.g. with thiols used as radical scavengers. In the figure 1SI one can see some changes in the aromatic part of the spectrum, as well as a decrease in the intensity of the signals of model oxaziridine **5** in the presence of thiophenol, which indicates chemical transformations involving thiophenol. It means the impossibility to use thiophenol as radical scavenger for accurate measurement of alkoxyamines **3a/4a** homolysis rate konstant  $k_d$ .

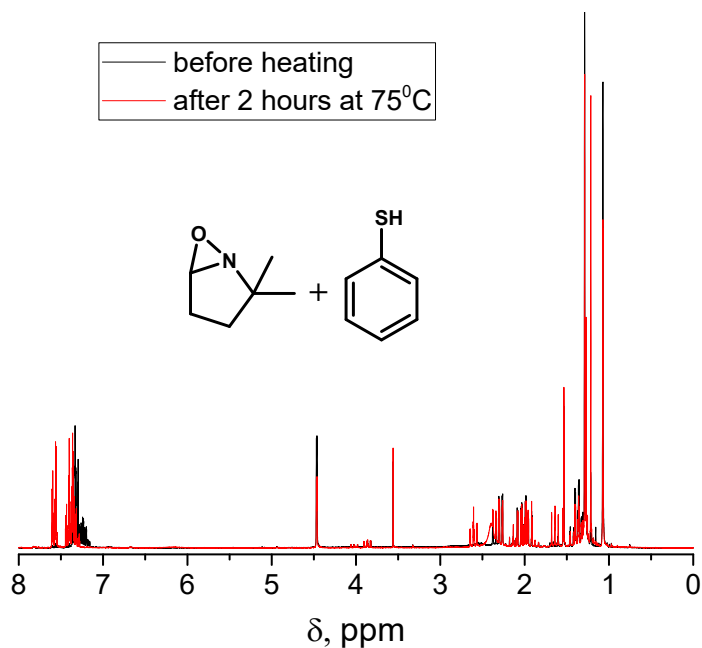

Figure 1SI – <sup>1</sup>H NMR spectra of a mixture of thiophenol and model oxaziridine before and after heating.

## SECTION 2. QUANTUM YIELD OF STUDIED PHOTOCHEMICAL PROCESSES.

The experiment was set up in such a way that the laser spot almost completely covered the area of the frontal layer of the sample. At the same time, a high concentration of the irradiated compound causes a linear conversion with time at the initial stages of the experiment. Based on the appearance of the UV spectra of compounds **1a** and **2a** (Figure 2SI), it can be seen that at a wavelength of 266 nm, the absorption coefficient  $\epsilon$  is less than 1000 l/mol/cm. This means that already at concentrations of the order of 1 mM, with an optical path length of 1 cm, 99% of the light is absorbed. In our experiments, the concentration was much higher (90-180 mM). Thus, the number of molecules transformed under the action of light is  $N = \phi N_0 = \alpha t$ , where  $\phi$  is the quantum yield, and  $\alpha$  is the slope of the function  $N(t)$ , which is linear at short irradiation times. Since the signals in the NMR spectra (Figure 3SI) are proportional to the concentration, knowing the initial concentration and irradiation power, one can estimate the quantum yield. The energy of absorbed photons  $W$  is equal to:

$$W = I \times t \quad (1)$$

where  $I$  is the radiation power (J/s) and  $t$  is the time. The energy of one quantum of light is equal to:

$$E = \frac{hc}{\lambda} \quad (2)$$

Then the number of absorbed photons is:

$$N_0 = \frac{W}{E} = \frac{I\lambda}{hc}t \quad (3)$$

In this way:

$$\phi = \frac{\alpha hc}{I\lambda} \quad (4)$$

Let's move from the number of molecules to concentration:

$$C = \frac{N}{N_A V} = \frac{\phi N_0}{N_A V} = \frac{\phi I \lambda}{hc N_A V} t \quad (5)$$

Using expression 6, the quantum yield of the photochemical rearrangement of alkoxyamines **1a** and **2a** was estimated, in both cases the obtained value was approximately 0.4.

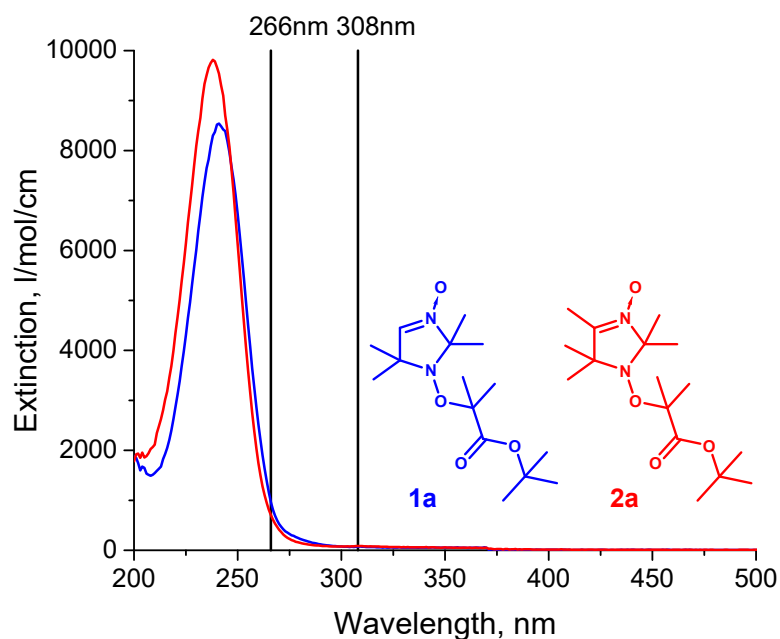

Figure 2SI – UV-vis spectra of alkoxyamines **1a** and **2a**.

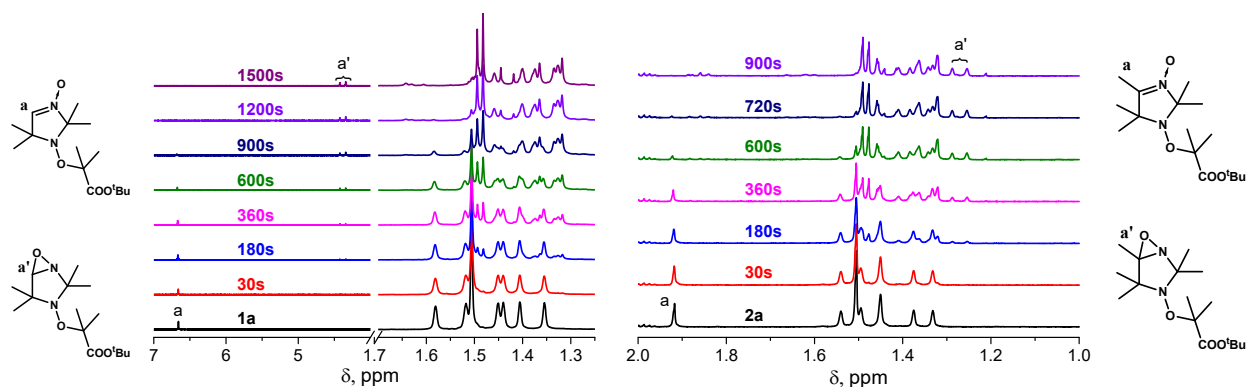

Figure 3SI – Evolution of  $^1\text{H}$  NMR spectra of alkoxyamines **1a** (left) and **2a** (right) during irradiation using Nd:YAG laser.  $C(\mathbf{1a}) = 0.18\text{ M}$ ,  $C(\mathbf{2a}) = 0.09\text{ M}$ ,  $\lambda = 266\text{ nm}$ ,  $l = 1\text{ cm}$ ,  $W = 100\text{ mW}$ ,  $\nu = 10\text{ Hz}$ .

### SECTION 3. NMR SPECTRA OF STUDIED OXAZIRIDINE-CONTAINING COMPOUNDS.

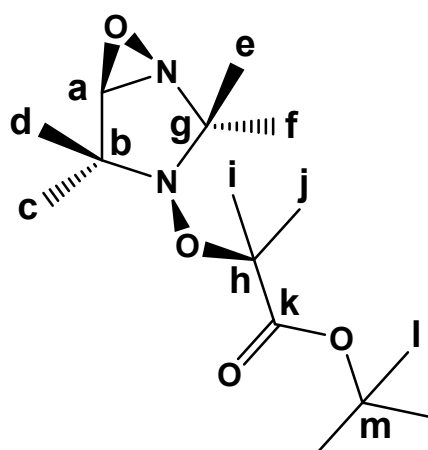

**3a (cis-isomer 1)**

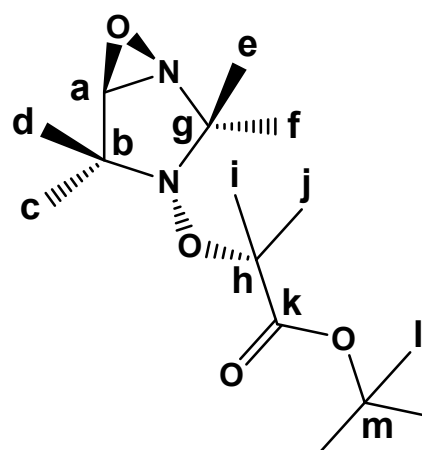

**3a (trans-isomer 2)**

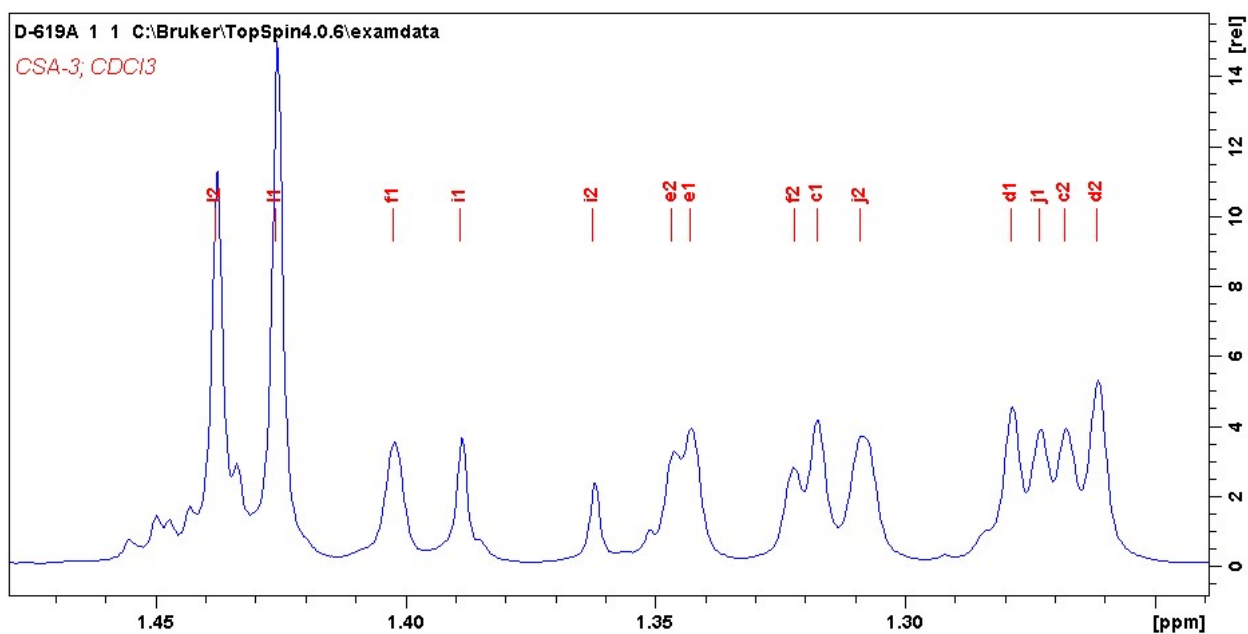

Figure 4SI – <sup>1</sup>H NMR spectrum of alkoxyamine 3a, aliphatic region.

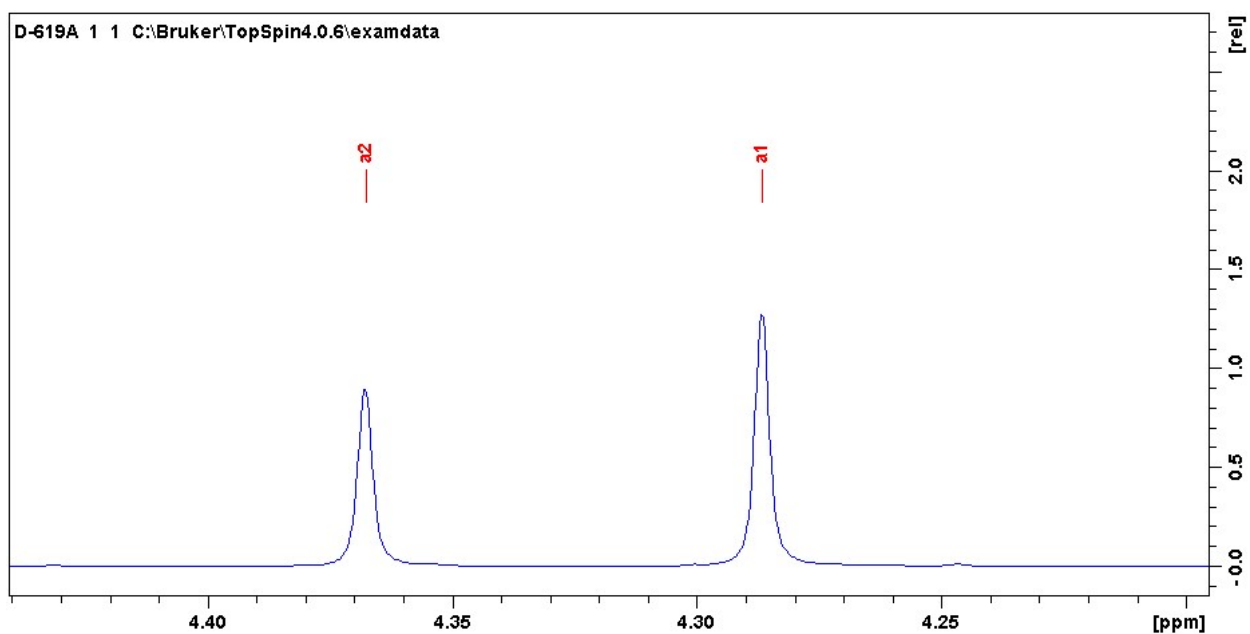

Figure 5SI –  $^1\text{H}$  NMR spectrum of alkoxyamine **3a**, mid-field region.

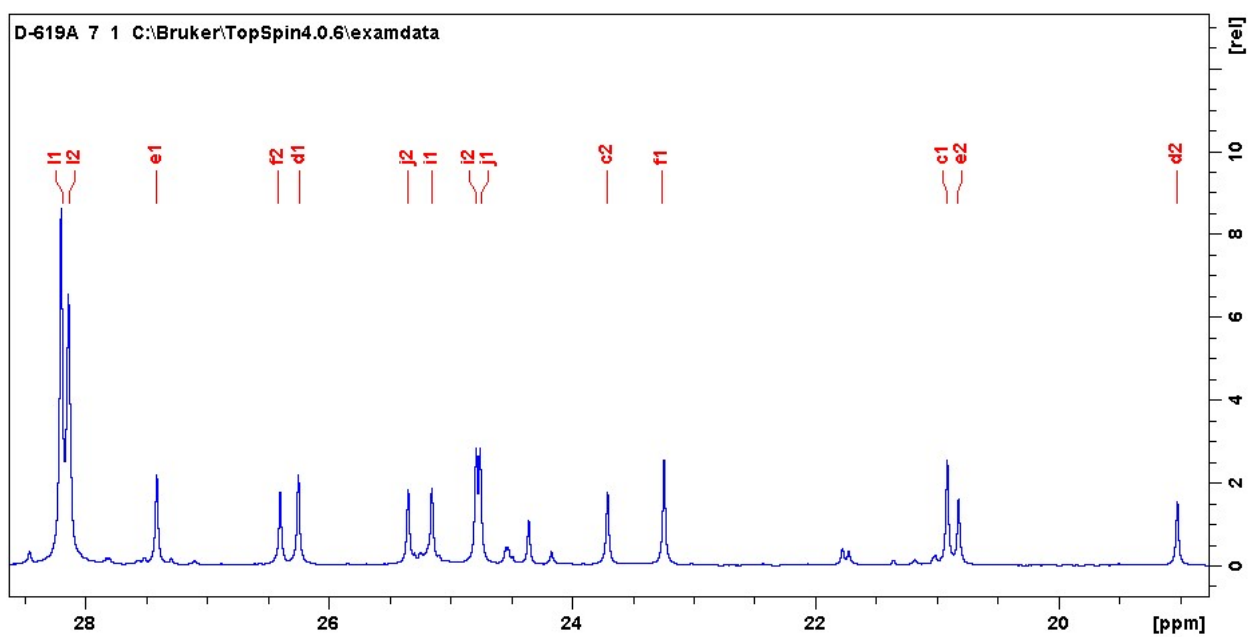

Figure 6SI –  $^{13}\text{C}$  NMR spectrum of alkoxyamine **3a**, aliphatic region.

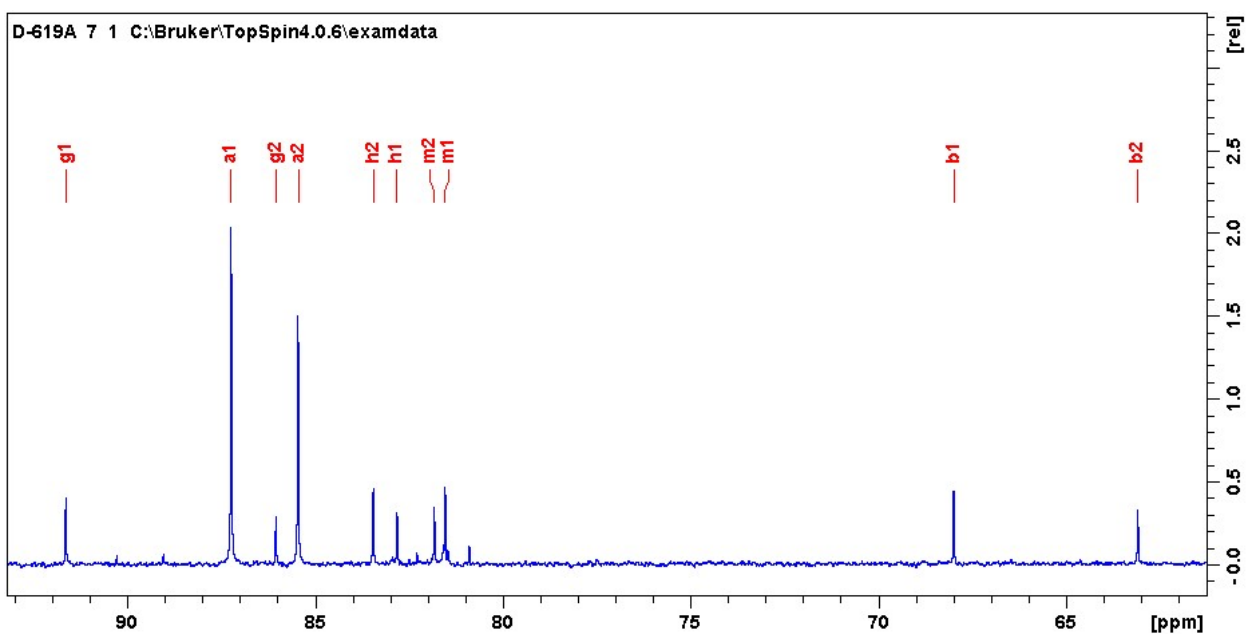

Figure 7SI –  $^{13}\text{C}$  NMR spectrum of alkoxyamine **3a**, mid-field region.

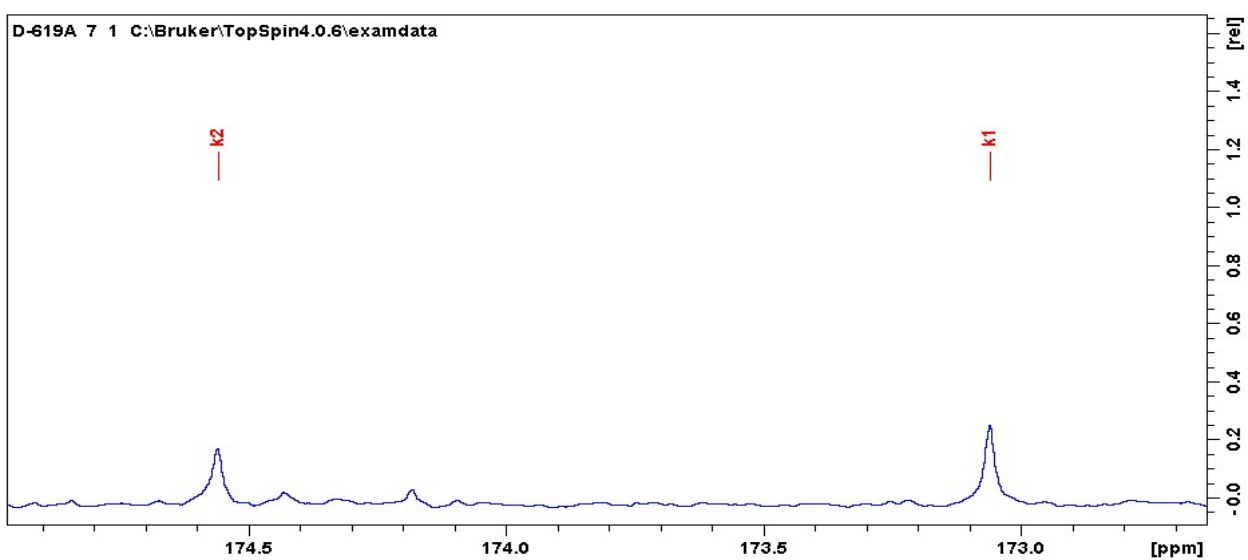

Figure 8SI –  $^{13}\text{C}$  NMR spectrum of alkoxyamine **3a**, region of location of carboxylic carbon signals.

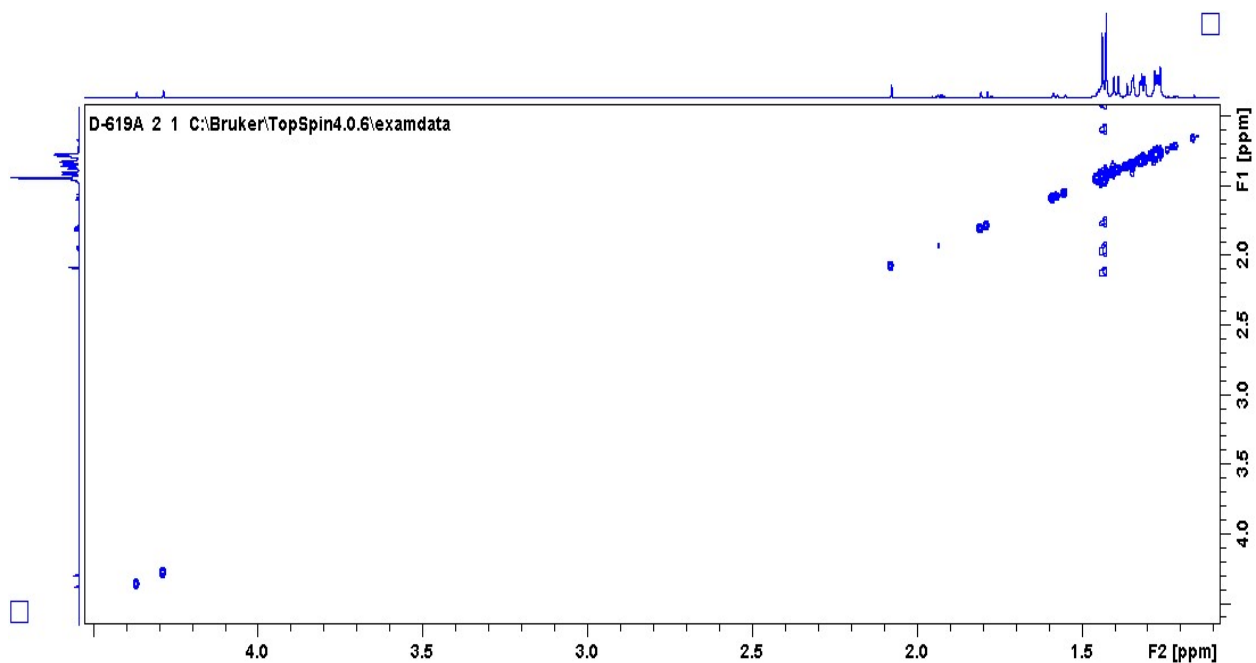

Figure 9SI – <sup>1</sup>H-<sup>1</sup>H 2D NMR spectrum (COSY).

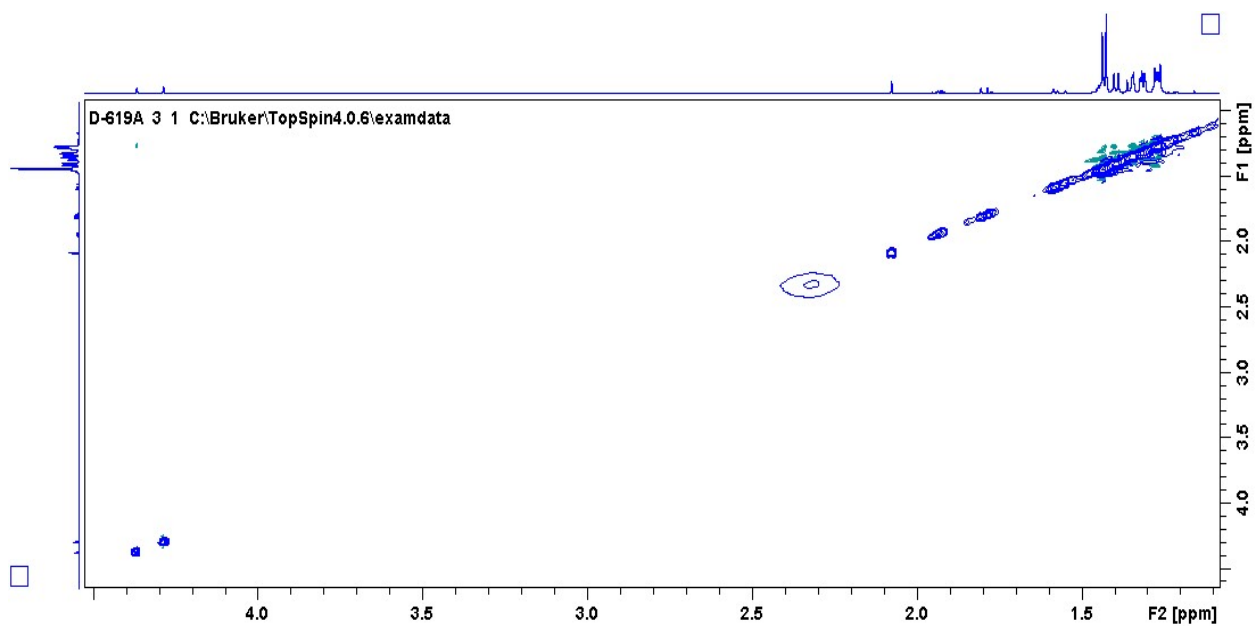

Figure 10SI – <sup>1</sup>H-<sup>1</sup>H 2D NMR spectrum (NOESY).



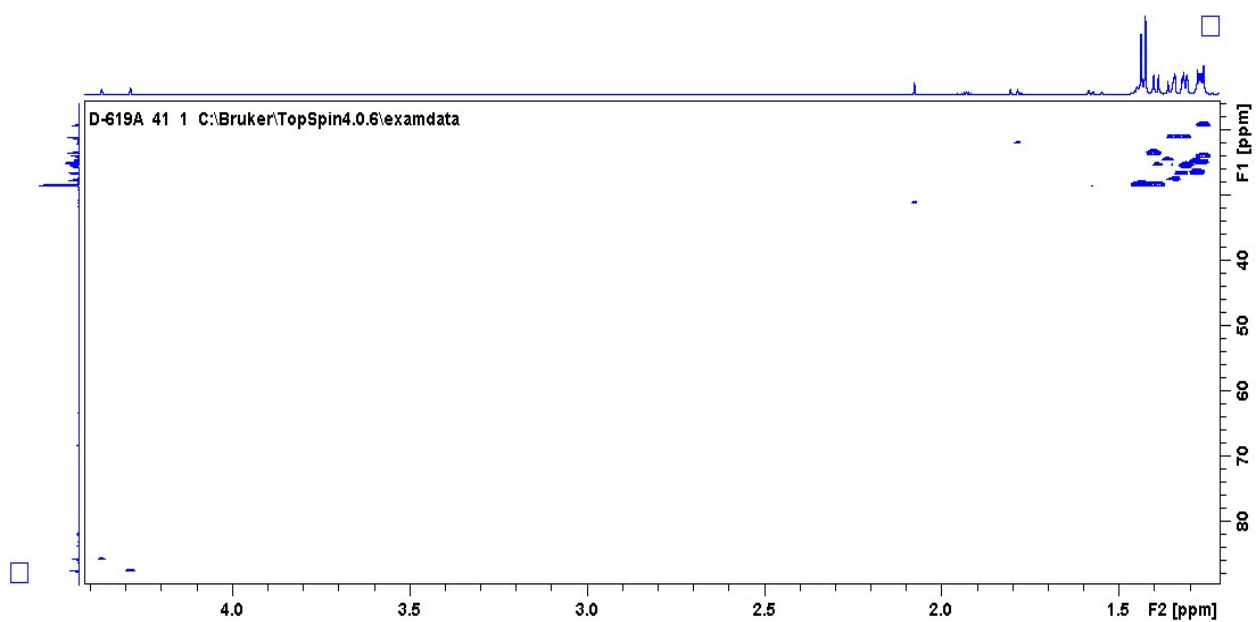

Figure 11SI –  $^1\text{H}$ - $^{13}\text{C}$  2D NMR spectrum (HSQC).

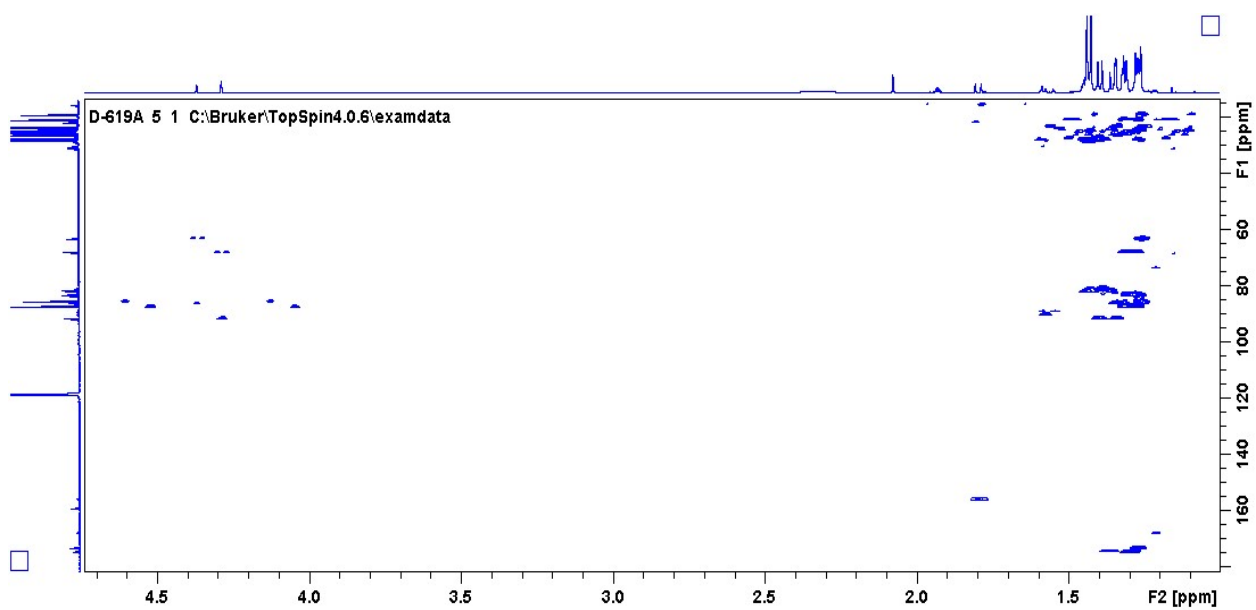

Figure 12SI –  $^1\text{H}$ - $^{13}\text{C}$  2D NMR spectrum (HMBC).

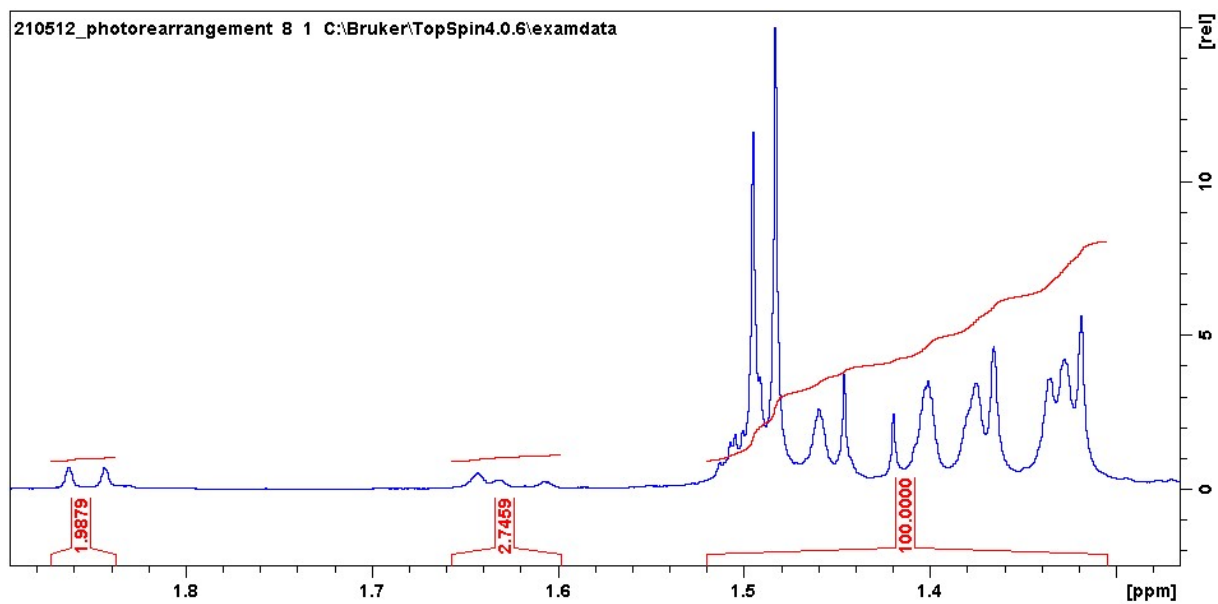

Figure 13SI – The total integral of the signals of the alkoxyamine **3a** (on the right), as well as the integrals of the signals of the products of secondary photolysis (on the left and in the middle).

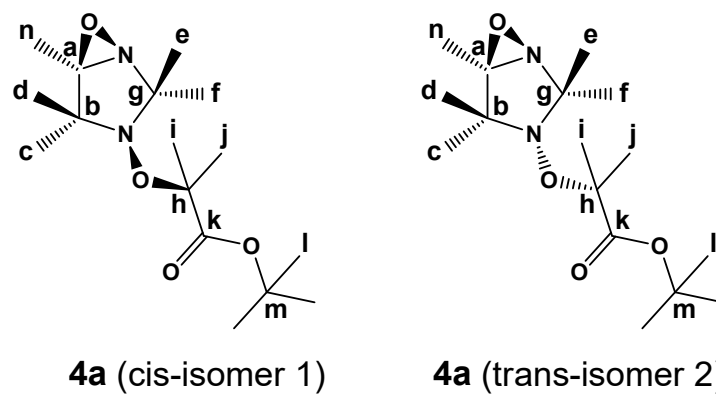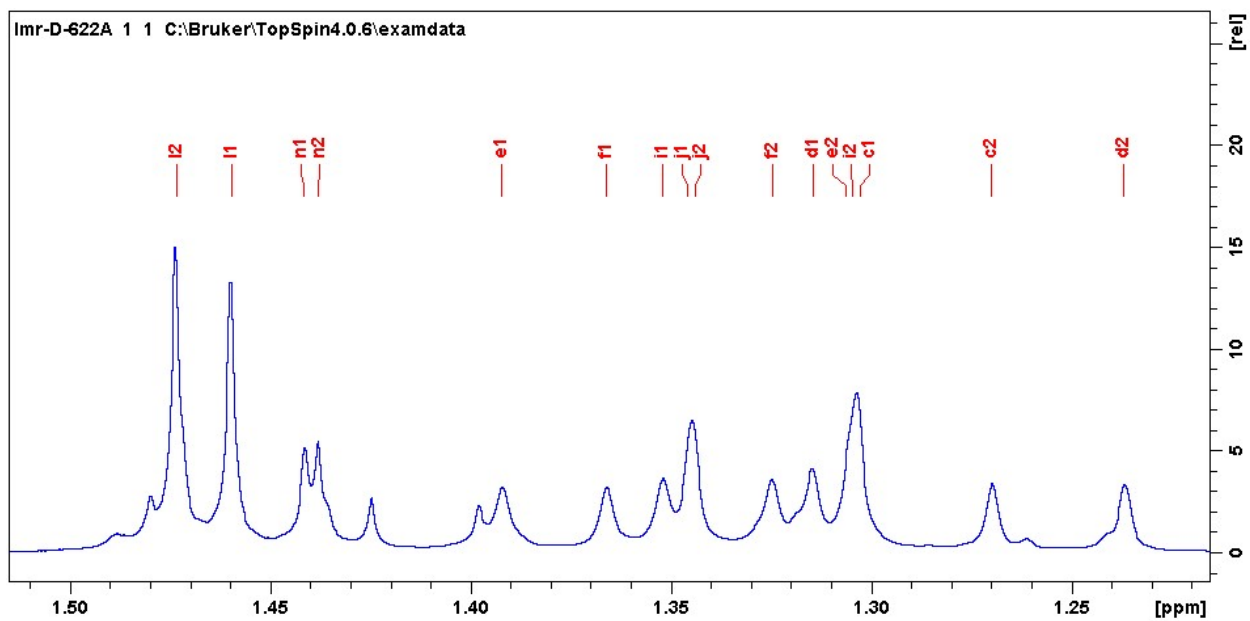

Figure 14SI –  $^1\text{H}$  NMR spectrum of alkoxyamine **4a**.

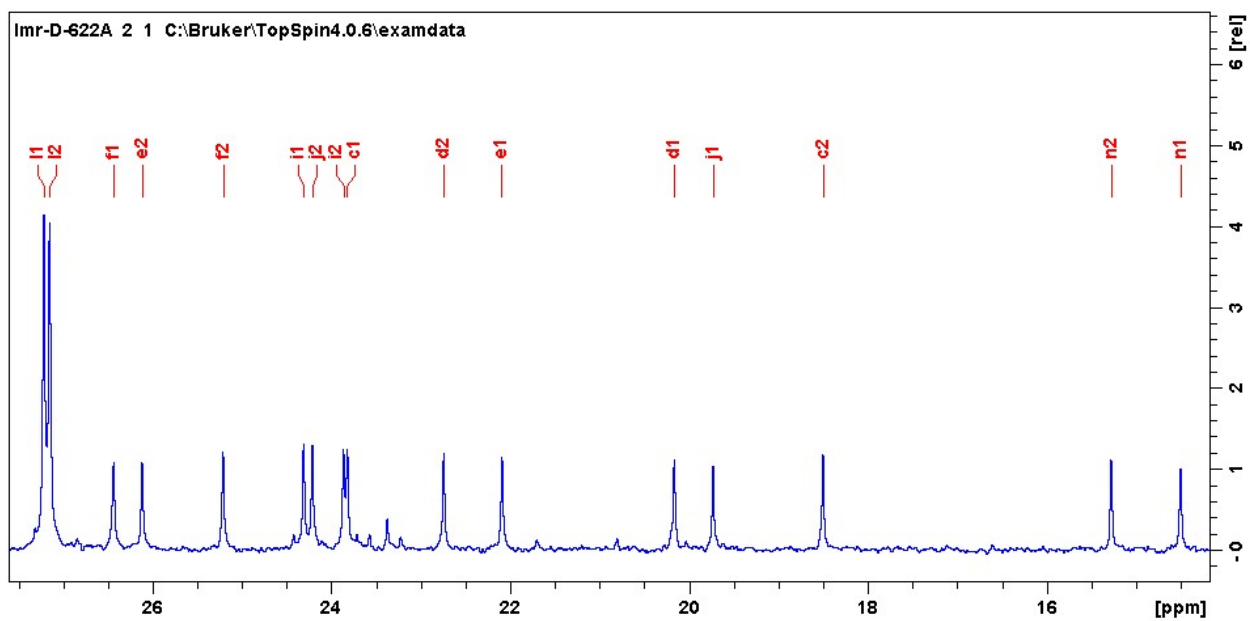

Figure 15SI –  $^{13}\text{C}$  NMR spectrum of alkoxyamine **4a**, aliphatic region.

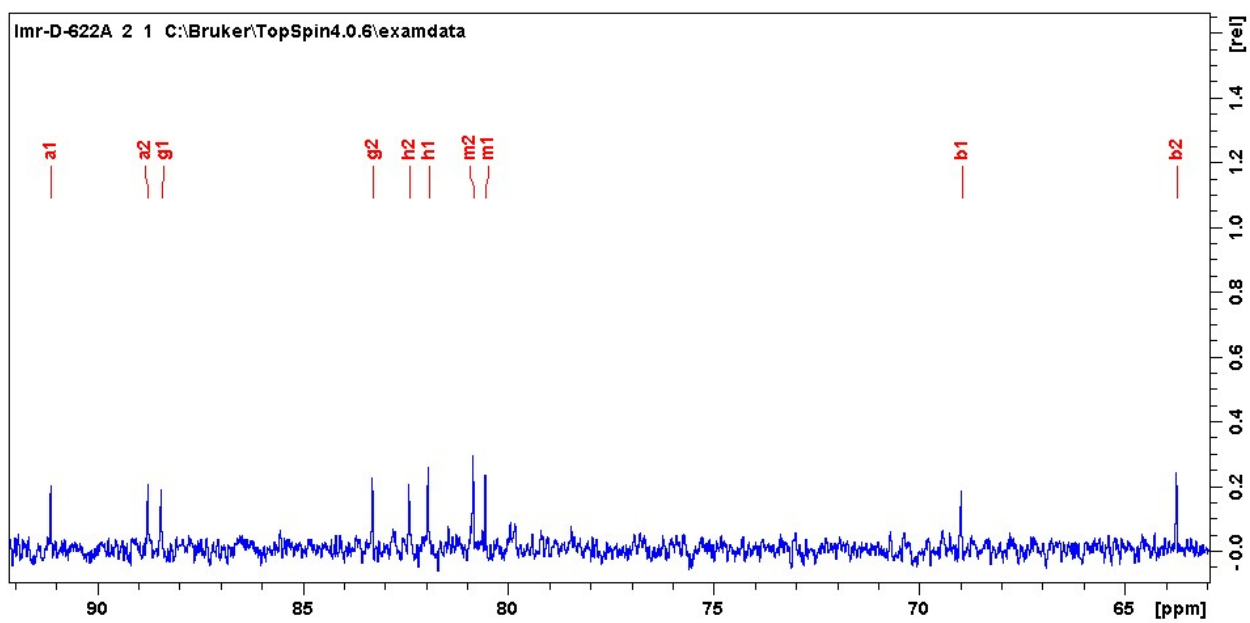

Figure 16SI –  $^{13}\text{C}$  NMR spectrum of alkoxyamine **4a**, mid-field region.

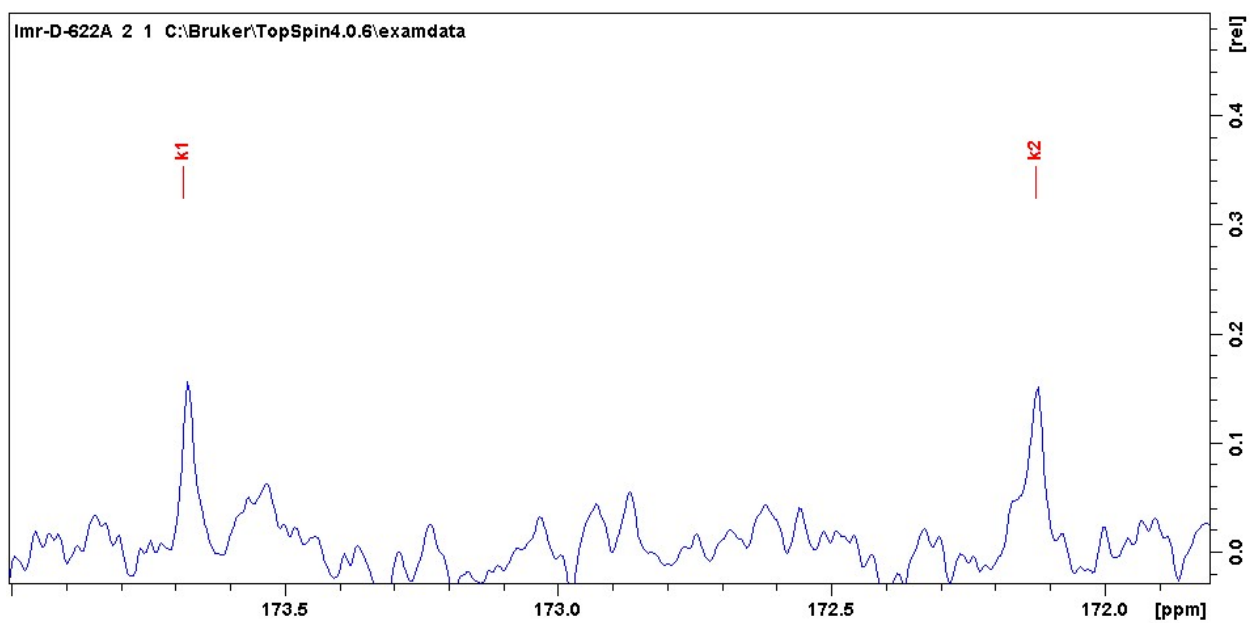

Figure 17SI –  $^{13}\text{C}$  NMR spectrum of alkoxyamine **4a**, region of location of carboxylic carbon signals.

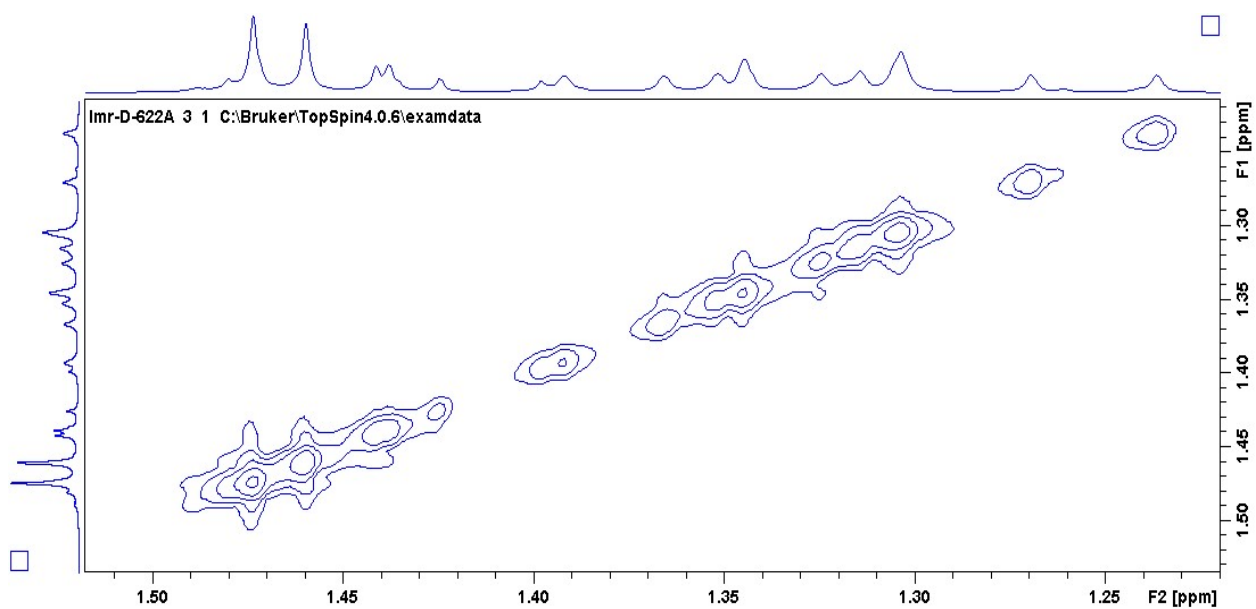

Figure 18SI – <sup>1</sup>H-<sup>1</sup>H 2D NMR spectrum (COSY).

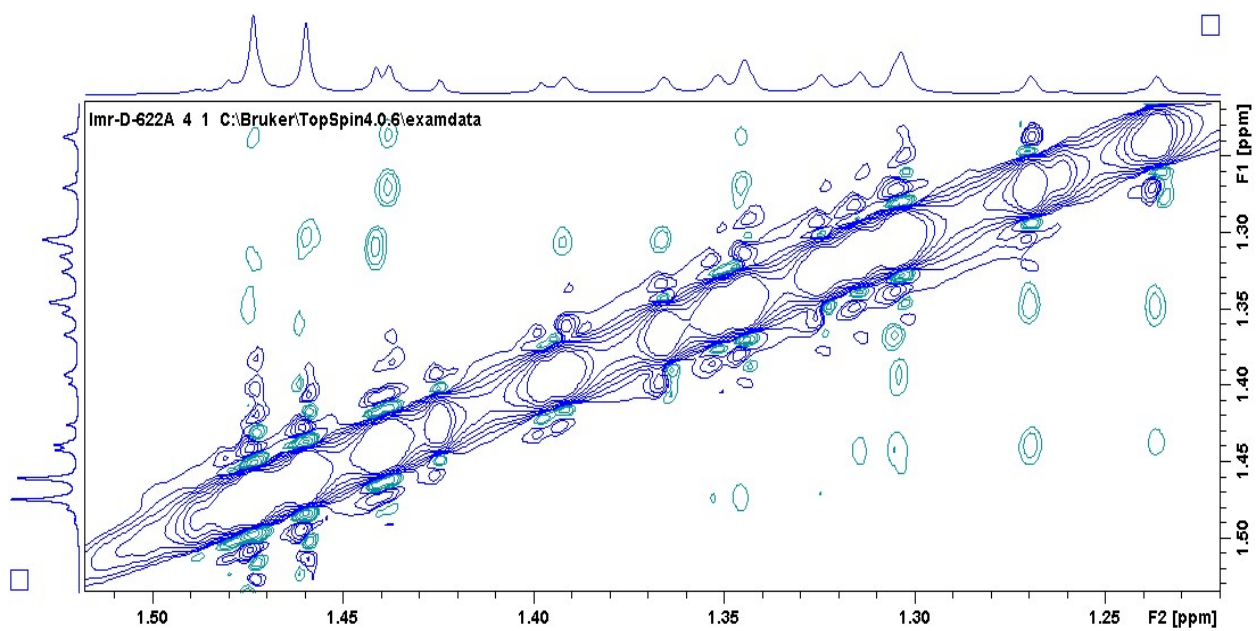

Figure 19SI – <sup>1</sup>H-<sup>1</sup>H 2D NMR spectrum (NOESY).

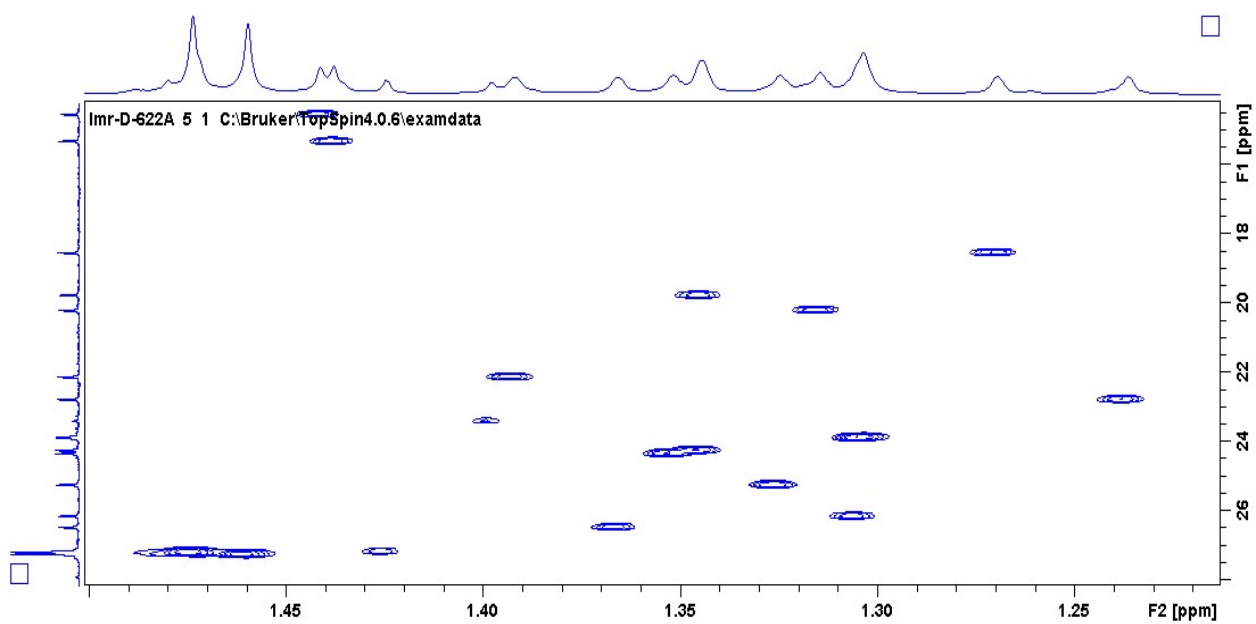

Figure 20SI –  $^1\text{H}$ - $^{13}\text{C}$  2D NMR spectrum (HSQC).

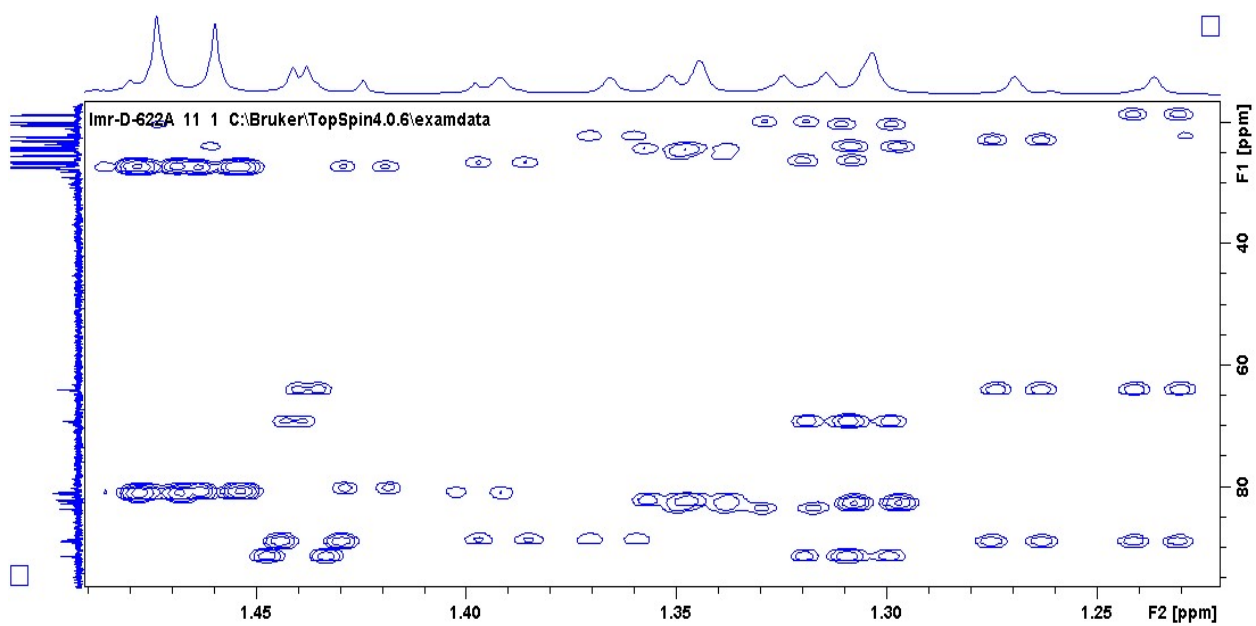

Figure 21SI –  $^1\text{H}$ - $^{13}\text{C}$  2D NMR spectrum (HMBC).

Table 1SI – Theoretical and experimental chemical shifts of isomers of alkoxyamines **3a** and

**4a.**

| Atom lable | Alkoxyamine <b>3a</b> |                 |                |                 |                |                 |                |                 |
|------------|-----------------------|-----------------|----------------|-----------------|----------------|-----------------|----------------|-----------------|
|            | Experiment            |                 |                |                 | Theory         |                 |                |                 |
|            | Cis-isomer 1          |                 | Trans-isomer 2 |                 | Cis-isomer 1   |                 | Trans-isomer 2 |                 |
|            | <sup>1</sup> H        | <sup>13</sup> C | <sup>1</sup> H | <sup>13</sup> C | <sup>1</sup> H | <sup>13</sup> C | <sup>1</sup> H | <sup>13</sup> C |
| a          | 4.287                 | 87.24           | 4.368          | 85.46           | 3.448          | 72.50           | 3.521          | 69.03           |
| b          | – <sup>a</sup>        | 68.00           | – <sup>a</sup> | 63.10           | – <sup>a</sup> | 54.57           | – <sup>a</sup> | 50.32           |
| c          | 1.318                 | 20.92           | 1.268          | 23.72           | 1.035          | 15.19           | 1.220          | 8.12            |
| d          | 1.279                 | 26.24           | 1.262          | 19.03           | 0.951          | 9.70            | 0.964          | 13.74           |
| e          | 1.343                 | 27.43           | 1.347          | 20.83           | 1.323          | 11.38           | 1.104          | 15.29           |
| f          | 1.403                 | 23.27           | 1.322          | 26.42           | 1.052          | 19.22           | 1.011          | 10.35           |
| g          | – <sup>a</sup>        | 91.66           | – <sup>a</sup> | 86.06           | – <sup>a</sup> | 79.95           | – <sup>a</sup> | 74.41           |
| h          | – <sup>a</sup>        | 82.83           | – <sup>a</sup> | 83.47           | – <sup>a</sup> | 70.36           | – <sup>a</sup> | 70.82           |
| i          | 1.389                 | 25.16           | 1.363          | 24.79           | 0.972          | 13.42           | 1.009          | 16.42           |
| j          | 1.273                 | 24.75           | 1.309          | 25.35           | 1.119          | 13.36           | 1.099          | 11.23           |
| k          | – <sup>a</sup>        | 173.06          | – <sup>a</sup> | 174.56          | – <sup>a</sup> | 168.38          | – <sup>a</sup> | 170.32          |
| l          | 1.426                 | 28.20           | 1.438          | 28.14           | 1.249          | 16.00           | 1.251          | 15.96           |
| m          | – <sup>a</sup>        | 81.55           | – <sup>a</sup> | 81.85           | – <sup>a</sup> | 66.62           | – <sup>a</sup> | 66.41           |
| Atom lable | Alkoxyamine <b>4a</b> |                 |                |                 |                |                 |                |                 |
|            | Experiment            |                 |                |                 | Theory         |                 |                |                 |
|            | Cis-isomer 1          |                 | Trans-isomer 2 |                 | Cis-isomer 1   |                 | Trans-isomer 2 |                 |
|            | <sup>1</sup> H        | <sup>13</sup> C | <sup>1</sup> H | <sup>13</sup> C | <sup>1</sup> H | <sup>13</sup> C | <sup>1</sup> H | <sup>13</sup> C |
| a          | – <sup>a</sup>        | 91.12           | – <sup>a</sup> | 88.76           | – <sup>a</sup> | 76.35           | – <sup>a</sup> | 72.72           |
| b          | – <sup>a</sup>        | 68.97           | – <sup>a</sup> | 63.74           | – <sup>a</sup> | 56.68           | – <sup>a</sup> | 51.84           |
| c          | 1.303                 | 23.83           | 1.270          | 18.51           | 1.024          | 15.91           | 0.923          | 9.34            |
| d          | 1.315                 | 20.17           | 1.237          | 22.75           | 0.865          | 10.05           | 1.213          | 13.86           |
| e          | 1.392                 | 22.10           | 1.306          | 26.12           | 1.282          | 11.34           | 1.074          | 15.29           |
| f          | 1.366                 | 26.44           | 1.325          | 25.21           | 1.033          | 19.36           | 0.981          | 10.27           |
| g          | – <sup>a</sup>        | 88.44           | – <sup>a</sup> | 83.30           | – <sup>a</sup> | 78.11           | – <sup>a</sup> | 72.81           |
| h          | – <sup>a</sup>        | 81.94           | – <sup>a</sup> | 82.41           | – <sup>a</sup> | 70.17           | – <sup>a</sup> | 70.86           |
| i          | 1.352                 | 24.31           | 1.305          | 23.87           | 1.654          | 13.57           | 1.103          | 11.16           |
| j          | 1.346                 | 19.73           | 1.344          | 24.22           | 0.968          | 13.40           | 1.003          | 16.49           |
| k          | – <sup>a</sup>        | 173.69          | – <sup>a</sup> | 172.13          | – <sup>a</sup> | 168.33          | – <sup>a</sup> | 170.37          |
| l          | 1.460                 | 27.22           | 1.474          | 27.15           | 1.245          | 15.97           | 1.250          | 15.93           |
| m          | – <sup>a</sup>        | 80.55           | – <sup>a</sup> | 80.85           | – <sup>a</sup> | 66.54           | – <sup>a</sup> | 66.37           |
| n          | 1.442                 | 14.51           | 1.438          | 15.28           | 0.959          | 5.20            | 0.969          | 4.51            |

<sup>a</sup> – quaternary carbon atom

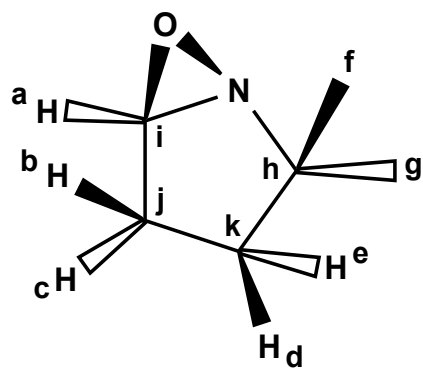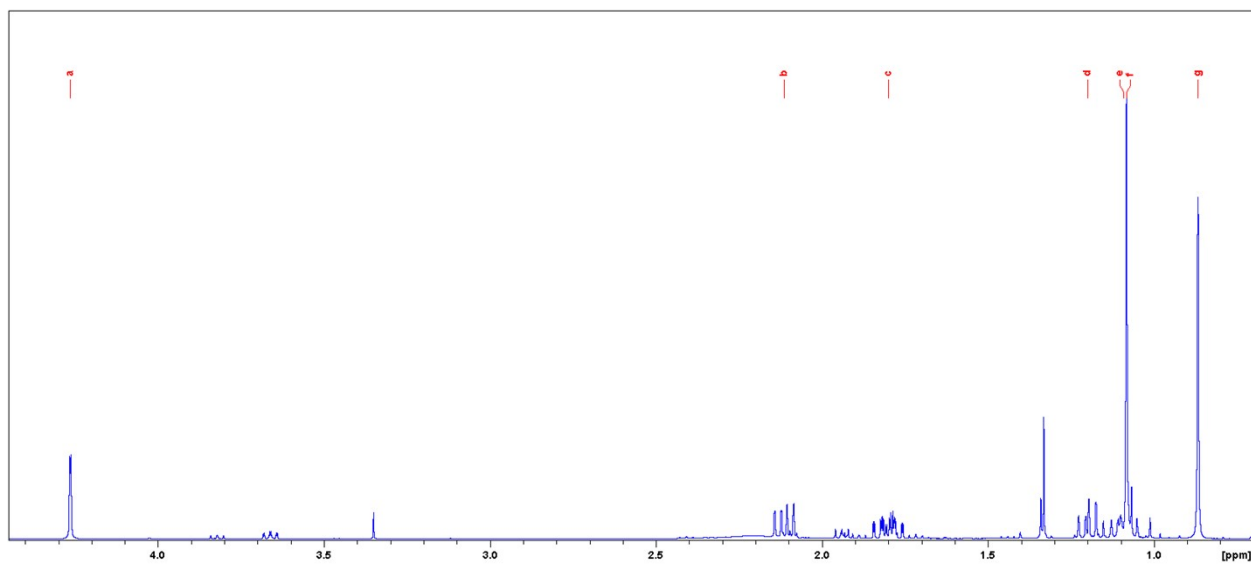

Figure 22SI –  $^1\text{H}$  NMR spectrum.

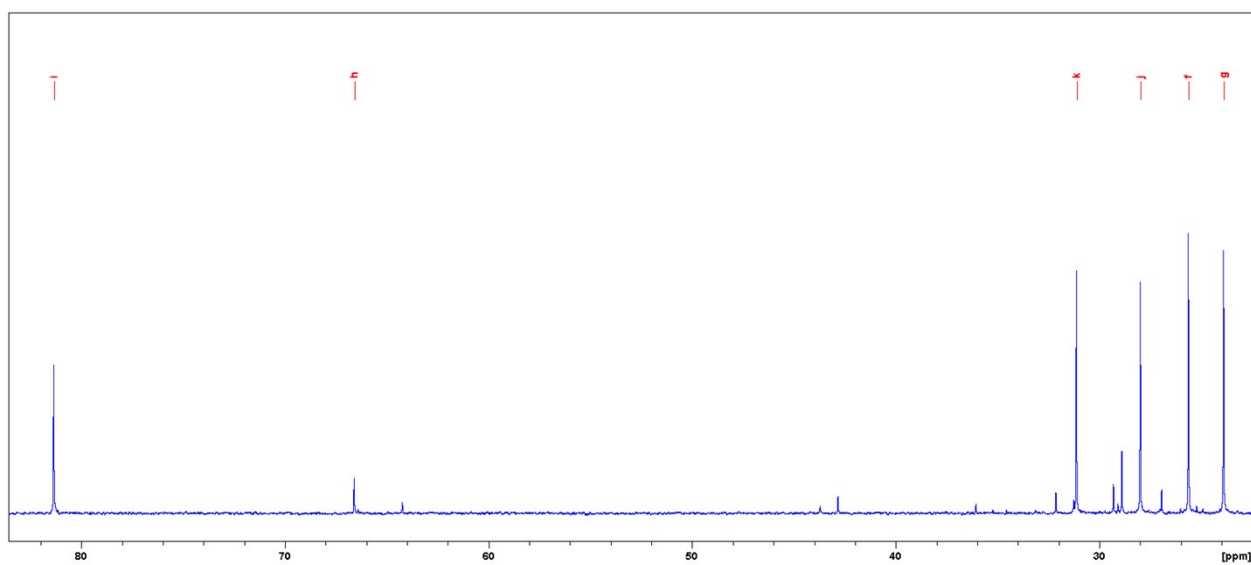

Figure 23SI –  $^{13}\text{C}$  NMR spectrum.



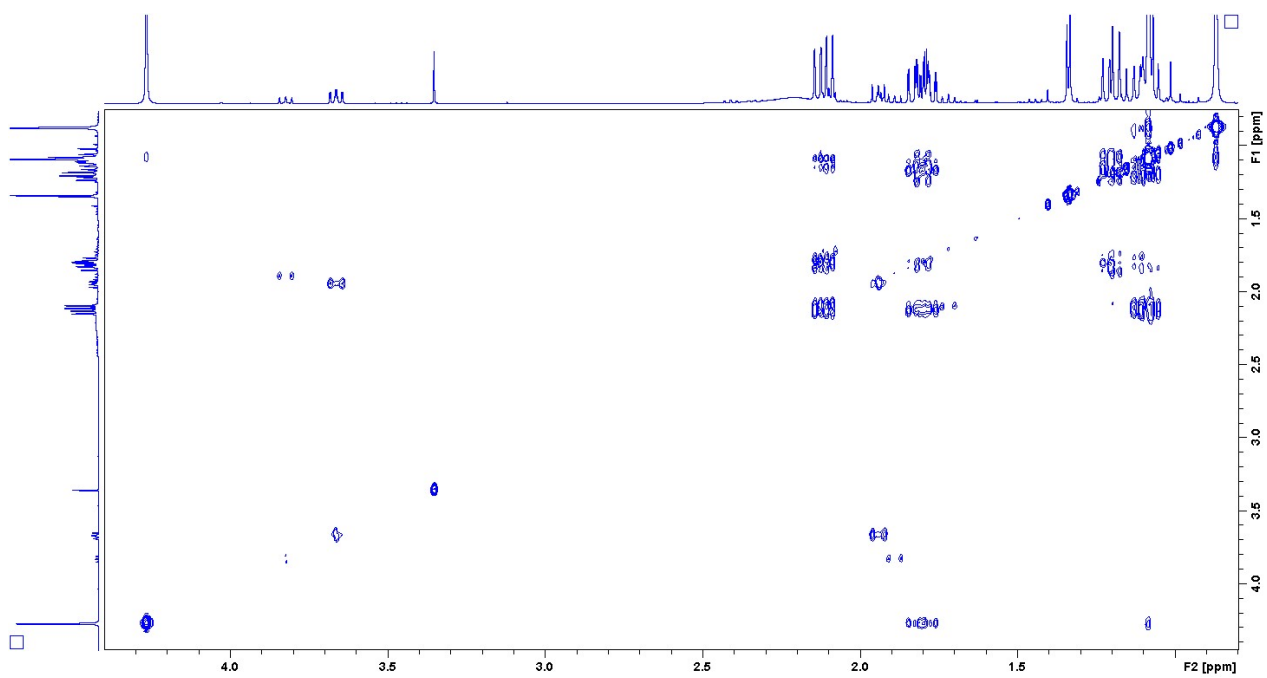

Figure 24SI – <sup>1</sup>H-<sup>1</sup>H 2D NMR spectrum (COSY).

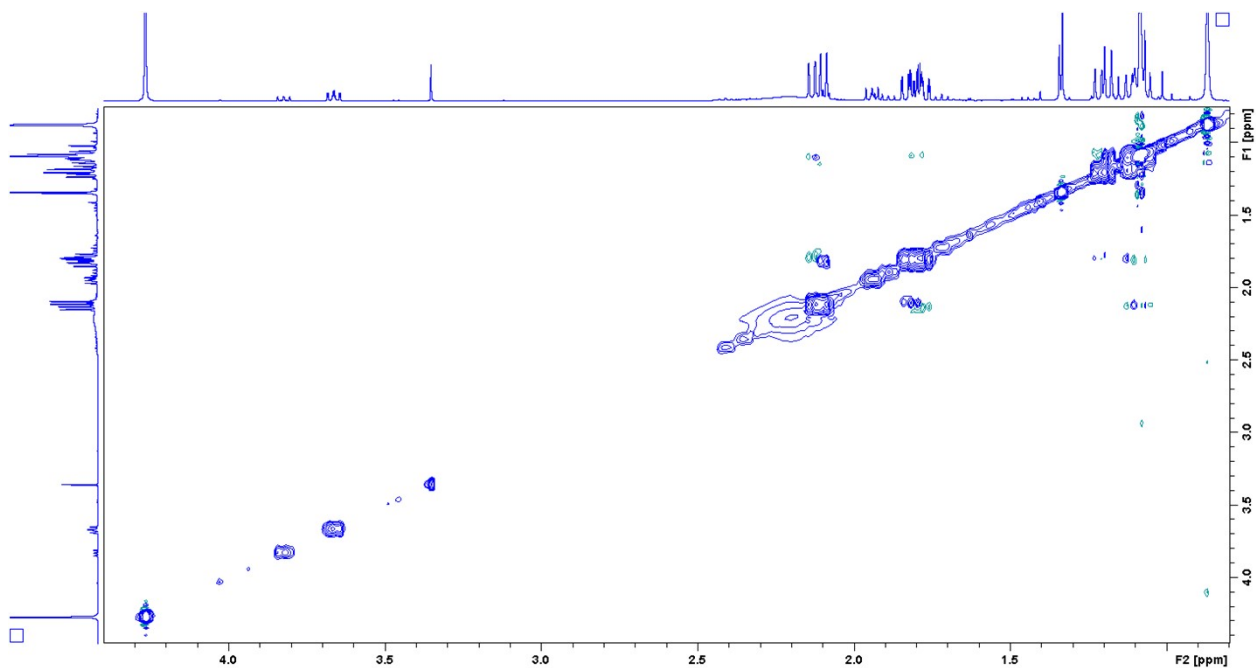

Figure 25SI – <sup>1</sup>H-<sup>1</sup>H 2D NMR spectrum (NOESY).

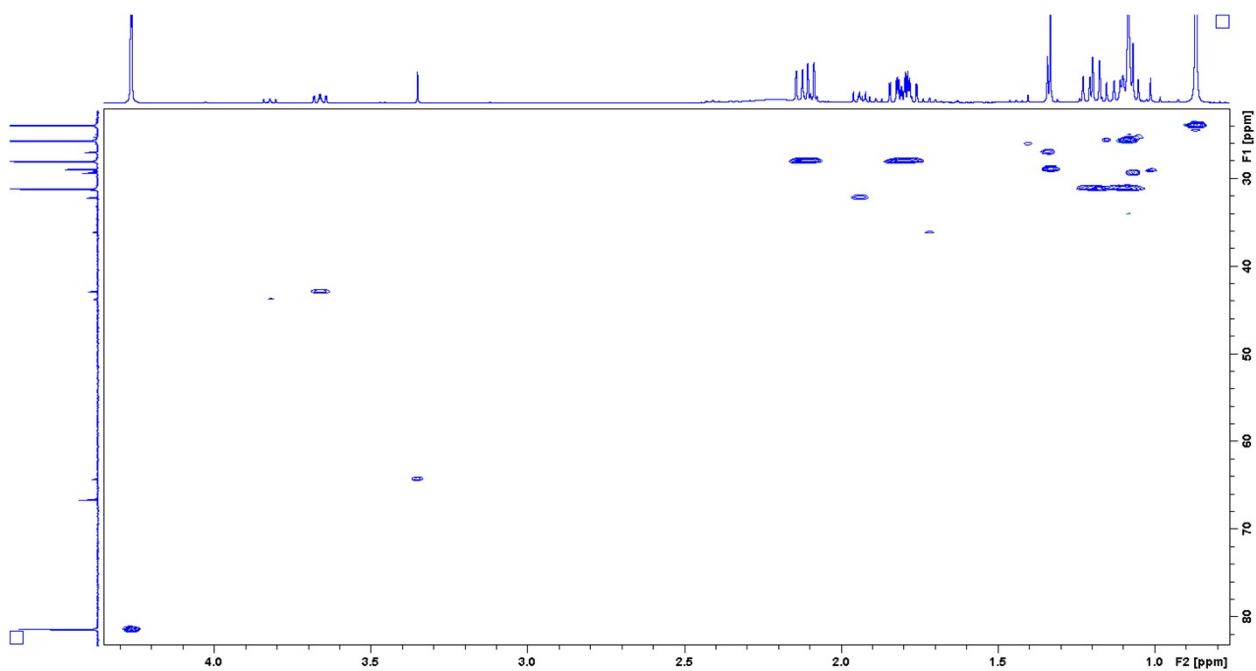

Figure 26SI –  $^1\text{H}$ - $^{13}\text{C}$  2D NMR spectrum (HSQC).

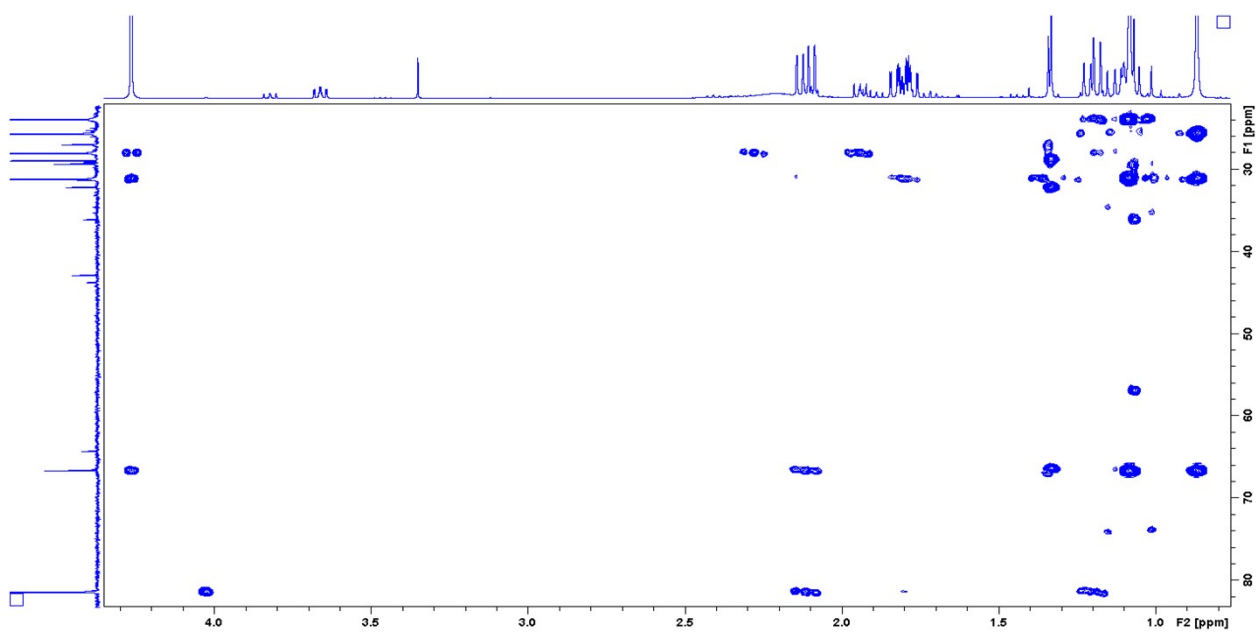

Figure 27SI –  $^1\text{H}$ - $^{13}\text{C}$  2D NMR spectrum (HMBC).

Table 2SI –  $^1\text{H}$ - $^1\text{H}$  coupling constants  $J$  (Hz).

|                | H <sup>a</sup> | H <sup>b</sup> | H <sup>c</sup> | H <sup>d</sup> | H <sup>e</sup> |
|----------------|----------------|----------------|----------------|----------------|----------------|
| H <sup>a</sup> | -              | -              | 1.3            | -              | -              |
| H <sup>b</sup> | -              | -              | 14.9           | 1.3            | 7.7            |
| H <sup>c</sup> | 1.3            | 14.9           | -              | 8.4            | 10.9           |
| H <sup>d</sup> | -              | 1.3            | 8.4            | -              | 12.4           |
| H <sup>e</sup> | -              | 7.7            | 10.9           | 12.4           | -              |

## SECTION 4. PURIFICATION OF ALKOXYAMINE 4a BY VACUUM DRYING.

After purification by vacuum drying of alkoxyamine **4a** formed by the photolysis of **2a** the  $^1\text{H}$  NMR spectrum (toluene- $d_8$ ) contained no by-products signal in comparison with those after photolysis of **2a** (acetonitrile- $d_3$ , ca. 1.8-1.9 ppm).

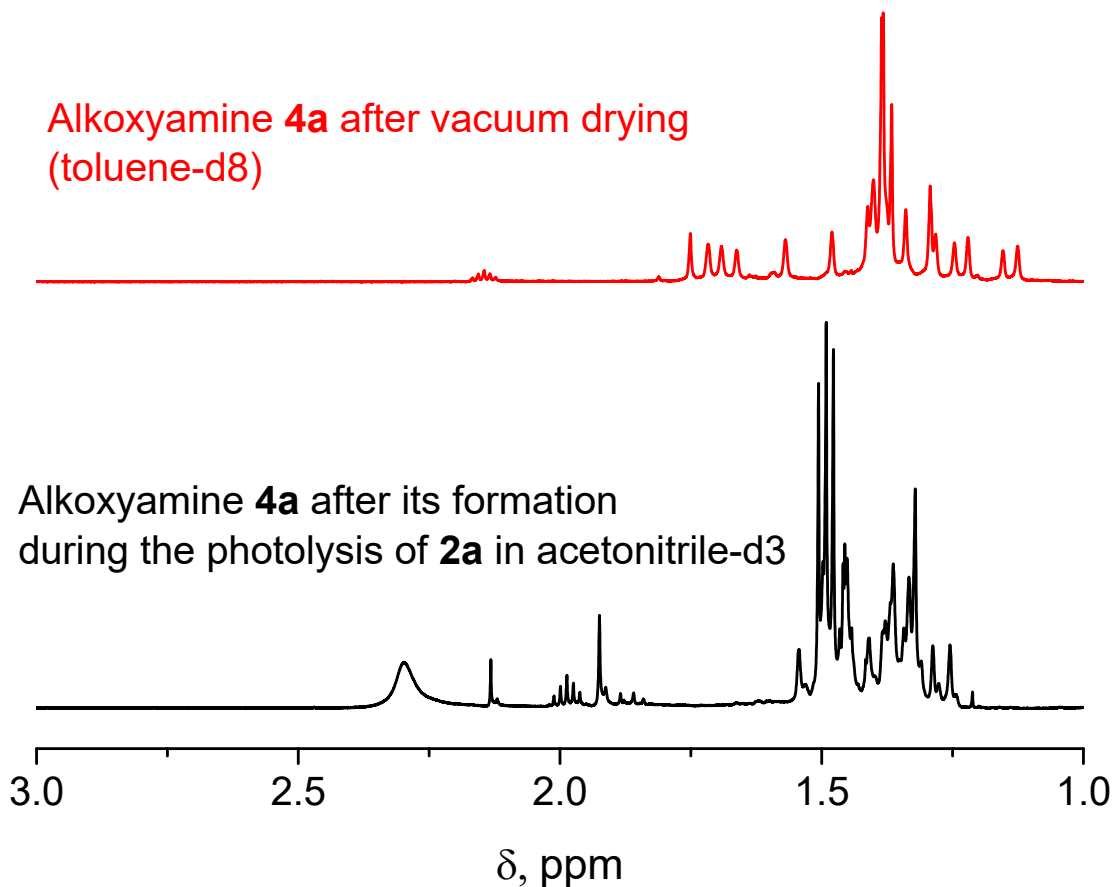

Figure 28SI –  $^1\text{H}$  NMR spectra of alkoxyamine **4a** after photolysis of **2a** ( $\text{CD}_3\text{CN}$ ) and after its purification by vacuum drying (toluene- $d_8$ ).

## SECTION 5. OPTIMIZED GEOMETRIES OF CALCULATED COMPOUNDS.

### 5.1 OPTIMIZED GEOMETRIES IN TOLUENE

a

|   |             |             |             |
|---|-------------|-------------|-------------|
| C | 2.03742100  | 0.20699600  | -0.00007700 |
| C | 0.72597500  | -0.42312100 | -0.00005000 |
| C | 3.25108700  | -0.65448300 | 0.00011500  |
| C | 2.16716500  | 1.69413200  | -0.00006500 |
| O | 0.54476300  | -1.63421200 | -0.00010700 |
| O | -0.26838300 | 0.49131500  | 0.00003300  |
| H | 2.98837600  | -1.71324900 | 0.00034600  |
| H | 3.87381300  | -0.44124400 | -0.87948600 |
| H | 3.87380900  | -0.44085400 | 0.87962200  |
| H | 1.67908600  | 2.13551600  | 0.87773800  |
| H | 3.21869700  | 1.99264700  | -0.00142500 |
| H | 1.67657600  | 2.13581000  | -0.87628800 |
| C | -1.66691500 | 0.08609600  | 0.00001800  |
| C | -1.99096800 | -0.70167400 | 1.26752400  |
| C | -1.99099000 | -0.70148100 | -1.26760100 |
| C | -2.40732200 | 1.41960200  | 0.00012600  |
| H | -3.07292900 | -0.86073100 | 1.32485700  |
| H | -1.49254800 | -1.67211500 | 1.27309300  |
| H | -1.68176000 | -0.13450400 | 2.15190800  |
| H | -1.49255800 | -1.67191500 | -1.27333400 |
| H | -3.07295000 | -0.86054400 | -1.32492700 |
| H | -1.68181700 | -0.13416900 | -2.15190600 |
| H | -2.14580900 | 2.00221400  | 0.88894300  |
| H | -2.14582300 | 2.00235000  | -0.88860700 |
| H | -3.48793200 | 1.24756300  | 0.00011900  |

1

|   |             |             |             |
|---|-------------|-------------|-------------|
| C | -1.03499900 | 0.39485700  | 0.01859000  |
| C | 0.37346700  | -1.46095900 | -0.03143000 |
| C | 1.33572900  | -0.31022300 | 0.00491800  |
| C | 2.23150400  | -0.32204600 | 1.24651900  |
| H | 2.92233600  | -1.16935500 | 1.20228300  |
| H | 2.81300600  | 0.60367600  | 1.28199600  |
| H | 1.63198900  | -0.40075600 | 2.15771600  |
| C | 2.16902100  | -0.19309500 | -1.27532400 |
| H | 2.75663000  | 0.72855700  | -1.24215100 |
| H | 2.85160100  | -1.04428600 | -1.35546700 |
| H | 1.52538500  | -0.17221100 | -2.15924600 |
| C | -1.79843900 | 0.79090500  | 1.27105600  |
| H | -1.81603900 | 1.88184700  | 1.33728100  |
| H | -2.82023600 | 0.41036100  | 1.21300900  |
| H | -1.31064600 | 0.38551600  | 2.16189600  |
| C | -1.70125300 | 0.87303500  | -1.26169900 |

|   |             |             |             |
|---|-------------|-------------|-------------|
| H | -2.71731800 | 0.47621900  | -1.31260800 |
| H | -1.73263000 | 1.96535600  | -1.25215800 |
| H | -1.13776100 | 0.53941900  | -2.13766300 |
| N | 0.37082800  | 0.80576200  | 0.08886800  |
| O | -1.91322700 | -1.81151100 | -0.05179700 |
| N | -0.86758600 | -1.09191900 | -0.02465800 |
| O | 0.71763800  | 2.02119700  | 0.03727100  |
| H | 0.62552200  | -2.51357400 | -0.06392000 |

## 2

|   |             |             |             |
|---|-------------|-------------|-------------|
| C | 1.26987000  | -0.20229300 | 0.01215900  |
| C | -0.73690000 | 1.00061800  | -0.00400500 |
| C | -1.19015400 | -0.43458200 | 0.01305500  |
| C | -1.60002900 | 2.20904500  | -0.02352300 |
| H | -2.65621400 | 1.93423000  | -0.05515600 |
| H | -1.41350200 | 2.82173800  | 0.86553900  |
| H | -1.36006700 | 2.82887200  | -0.89419300 |
| C | -2.01139500 | -0.78169200 | 1.25780400  |
| H | -2.97784200 | -0.26915900 | 1.22986900  |
| H | -2.18948800 | -1.86064800 | 1.28219000  |
| H | -1.48041600 | -0.48842400 | 2.16805500  |
| C | -1.93352900 | -0.83175200 | -1.26615900 |
| H | -2.12478500 | -1.90839100 | -1.25363000 |
| H | -2.89140600 | -0.30602800 | -1.32380100 |
| H | -1.34228800 | -0.58675000 | -2.15323200 |
| C | 2.13175000  | -0.30921500 | 1.25960100  |
| H | 2.55896800  | -1.31437500 | 1.30533200  |
| H | 2.93511200  | 0.42900500  | 1.21337600  |
| H | 1.53084400  | -0.13359700 | 2.15638000  |
| C | 2.06358300  | -0.37668800 | -1.27334300 |
| H | 2.84904600  | 0.38069900  | -1.31957300 |
| H | 2.51247300  | -1.37307200 | -1.27820600 |
| H | 1.41174700  | -0.27414000 | -2.14559400 |
| N | 0.12036100  | -1.11071000 | 0.07053300  |
| O | 1.24286800  | 2.18248700  | -0.01957800 |
| N | 0.55544700  | 1.10513200  | -0.00437100 |
| O | 0.25062900  | -2.36768100 | 0.00532500  |

## 3

|   |             |             |             |
|---|-------------|-------------|-------------|
| C | -1.22940600 | 0.06797100  | 0.08673100  |
| C | 0.65122800  | -1.23052000 | 0.65325000  |
| C | 1.24595200  | 0.03726700  | 0.07918400  |
| C | 1.87766200  | 0.90217900  | 1.17171600  |
| H | 2.80618200  | 0.44334600  | 1.52534200  |
| H | 2.10853400  | 1.88863100  | 0.76044200  |
| H | 1.20552400  | 1.02844300  | 2.02599900  |
| C | 2.21871600  | -0.22633600 | -1.06562400 |
| H | 2.50326900  | 0.72609900  | -1.52185600 |
| H | 3.12075100  | -0.71918700 | -0.69063500 |
| H | 1.75311500  | -0.85845700 | -1.82595600 |

|   |             |             |             |
|---|-------------|-------------|-------------|
| C | -1.82690600 | 0.95826300  | 1.17247800  |
| H | -2.03224400 | 1.94377600  | 0.74637300  |
| H | -2.75865500 | 0.52101500  | 1.53993400  |
| H | -1.13766000 | 1.07467100  | 2.01357900  |
| C | -2.20952700 | -0.20262300 | -1.04155600 |
| H | -3.11568200 | -0.66417900 | -0.64024000 |
| H | -2.47124700 | 0.74426600  | -1.52095400 |
| H | -1.76024100 | -0.86775900 | -1.78190100 |
| N | 0.01693200  | 0.66455800  | -0.44509100 |
| O | -0.07538000 | -1.99309600 | -0.26036500 |
| N | -0.78505000 | -1.17958500 | 0.73897500  |
| O | 0.02537200  | 1.77813200  | -1.04633900 |
| H | 1.18893100  | -1.77297200 | 1.42923500  |

#### 4

|   |             |             |             |
|---|-------------|-------------|-------------|
| C | -1.34281900 | -0.30313300 | 0.13038100  |
| C | 0.94723000  | -0.87496200 | -0.02729100 |
| C | 0.93305800  | 0.64834000  | -0.04238200 |
| C | 1.45147200  | 1.25838100  | 1.26200200  |
| H | 2.53574200  | 1.13141500  | 1.33805800  |
| H | 1.22428500  | 2.32801400  | 1.26540300  |
| H | 0.98445300  | 0.80131300  | 2.13992200  |
| C | 1.66334200  | 1.22612400  | -1.25127000 |
| H | 1.48959700  | 2.30520400  | -1.29276900 |
| H | 2.73995000  | 1.04917900  | -1.16534700 |
| H | 1.29602500  | 0.77182500  | -2.17479300 |
| C | -1.92798000 | -0.19699000 | 1.53599300  |
| H | -2.52617000 | 0.71557900  | 1.60247300  |
| H | -2.56356600 | -1.06238600 | 1.73995100  |
| H | -1.13763000 | -0.15716400 | 2.29102900  |
| C | -2.41550200 | -0.49014400 | -0.92844200 |
| H | -3.00753500 | -1.38055700 | -0.70083400 |
| H | -3.07014100 | 0.38523600  | -0.93168200 |
| H | -1.95820800 | -0.59982700 | -1.91400800 |
| N | -0.51703300 | 0.88483200  | -0.17993200 |
| O | 0.32076400  | -1.42362100 | -1.15467700 |
| N | -0.37969400 | -1.41788600 | 0.13990200  |
| O | -1.01189500 | 2.04789500  | -0.24768400 |
| C | 2.11901200  | -1.62136100 | 0.53535700  |
| H | 3.03266300  | -1.34866700 | -0.00306500 |
| H | 2.25528100  | -1.38649300 | 1.59435400  |
| H | 1.94452300  | -2.69302100 | 0.42432200  |

#### 1a

|   |             |             |             |
|---|-------------|-------------|-------------|
| C | -2.74766300 | 0.39759700  | 0.03147900  |
| C | -2.53397800 | -1.91256800 | -0.05060300 |
| C | -1.12175100 | -1.42032500 | -0.09398000 |
| C | -0.37963500 | -1.85802600 | 1.17423800  |
| H | -0.36875800 | -2.95256500 | 1.21261300  |

|   |             |             |             |
|---|-------------|-------------|-------------|
| H | 0.64861600  | -1.49108200 | 1.16706000  |
| H | -0.87684800 | -1.48160700 | 2.07239200  |
| C | -0.40163700 | -1.91672600 | -1.35056600 |
| H | 0.58751600  | -1.45722100 | -1.42239600 |
| H | -0.27821700 | -3.00541700 | -1.32317200 |
| H | -0.96926700 | -1.64453900 | -2.24502200 |
| C | -3.04556400 | 1.06827600  | 1.36445300  |
| H | -2.62709300 | 2.07702200  | 1.37849500  |
| H | -4.13054800 | 1.12430300  | 1.48042600  |
| H | -2.61902200 | 0.50202600  | 2.19636700  |
| C | -3.34172800 | 1.16406900  | -1.14269600 |
| H | -4.42854800 | 1.20477500  | -1.03939900 |
| H | -2.94548500 | 2.18110100  | -1.16119800 |
| H | -3.08407700 | 0.66729800  | -2.08294400 |
| N | -1.31645700 | 0.06485800  | -0.20108400 |
| O | -4.66473900 | -1.03539400 | 0.12219900  |
| N | -3.39699400 | -0.96035800 | 0.03979700  |
| O | -0.50572600 | 0.74674100  | 0.72939400  |
| C | 0.44464300  | 1.63532200  | 0.11821600  |
| C | 1.60321000  | 0.82992300  | -0.50691100 |
| C | -0.18109100 | 2.53716100  | -0.93112800 |
| C | 0.98336700  | 2.44372200  | 1.29645900  |
| O | 1.92135500  | 0.89947000  | -1.67265100 |
| O | 2.22493800  | 0.09160200  | 0.41527100  |
| H | -0.56544100 | 1.95868100  | -1.77218800 |
| H | -0.99424500 | 3.10792600  | -0.47210200 |
| H | 0.56829400  | 3.23890600  | -1.30669900 |
| H | 1.80743500  | 3.08617400  | 0.97015500  |
| H | 0.18331300  | 3.07374000  | 1.69601600  |
| H | 1.34395600  | 1.77757400  | 2.08276700  |
| C | 3.49144700  | -0.59172800 | 0.13968100  |
| C | 4.53409200  | 0.42167100  | -0.32466500 |
| C | 3.28639800  | -1.71386000 | -0.87206800 |
| C | 3.86838600  | -1.16090200 | 1.50272400  |
| H | 5.51666800  | -0.06054800 | -0.34177400 |
| H | 4.31387900  | 0.79963700  | -1.32423300 |
| H | 4.57949200  | 1.26248800  | 0.37596700  |
| H | 2.98005600  | -1.32466300 | -1.84531600 |
| H | 4.22926100  | -2.25696000 | -0.99522500 |
| H | 2.53264300  | -2.42132600 | -0.51049100 |
| H | 3.99338700  | -0.35579600 | 2.23324300  |
| H | 3.09075000  | -1.84158800 | 1.86307600  |
| H | 4.80865800  | -1.71519600 | 1.42740800  |
| H | -2.85980800 | -2.94563700 | -0.06630300 |

## 2a

|   |             |             |             |
|---|-------------|-------------|-------------|
| C | -1.05431500 | -1.13128400 | -0.06784900 |
| C | -3.30198200 | -0.52972800 | 0.01897800  |
| C | -2.56390400 | 0.78019100  | 0.06238400  |
| C | -4.77260500 | -0.74306000 | 0.05428400  |
| H | -5.30193500 | 0.18303900  | 0.28704100  |

|   |             |             |             |
|---|-------------|-------------|-------------|
| H | -5.12642000 | -1.12055300 | -0.91240300 |
| H | -5.01846800 | -1.50248500 | 0.80344300  |
| C | -3.04772500 | 1.69466000  | -1.06843600 |
| H | -4.12446100 | 1.87544500  | -0.97878200 |
| H | -2.54149500 | 2.66197200  | -1.02680100 |
| H | -2.84724600 | 1.23425400  | -2.04047500 |
| C | -2.75933100 | 1.46286200  | 1.42116200  |
| H | -2.22681300 | 2.41710900  | 1.45272300  |
| H | -3.82587300 | 1.65829000  | 1.57346000  |
| H | -2.39608200 | 0.83616900  | 2.23979700  |
| C | -0.40911500 | -1.72389400 | -1.31154000 |
| H | 0.60885200  | -1.34059000 | -1.40910900 |
| H | -0.38380400 | -2.81459400 | -1.24676600 |
| H | -0.97401100 | -1.42657700 | -2.19994800 |
| C | -0.42176000 | -1.63743000 | 1.22122600  |
| H | -0.55330700 | -2.72183700 | 1.25816000  |
| H | 0.64027900  | -1.38954000 | 1.23985200  |
| H | -0.90092400 | -1.18646900 | 2.09479800  |
| N | -1.14804000 | 0.34735200  | -0.19252800 |
| O | -2.79827700 | -2.77345400 | -0.11670600 |
| N | -2.49250900 | -1.53198100 | -0.05888800 |
| O | -0.27179300 | 0.97166300  | 0.71986900  |
| C | 0.76324100  | 1.74309900  | 0.09053700  |
| C | 1.83310200  | 0.81514600  | -0.52284000 |
| C | 0.23233000  | 2.69180100  | -0.96941500 |
| C | 1.39286200  | 2.50744700  | 1.25383600  |
| O | 2.17978900  | 0.86038400  | -1.68167900 |
| O | 2.35246200  | 0.00562200  | 0.40257900  |
| H | -0.23444800 | 2.14627800  | -1.79068900 |
| H | -0.49845700 | 3.36456400  | -0.51039600 |
| H | 1.05322700  | 3.29052200  | -1.37248100 |
| H | 2.27340700  | 3.06039200  | 0.91129000  |
| H | 0.66439700  | 3.21928000  | 1.65303700  |
| H | 1.69307800  | 1.81734100  | 2.04504100  |
| C | 3.55233400  | -0.79682900 | 0.14735800  |
| C | 4.69774200  | 0.11364100  | -0.28748700 |
| C | 3.26041800  | -1.88761300 | -0.87685000 |
| C | 3.84456700  | -1.40758400 | 1.51307500  |
| H | 5.63005700  | -0.45991700 | -0.28128000 |
| H | 4.54000200  | 0.51165300  | -1.29108400 |
| H | 4.80484100  | 0.94571200  | 0.41704500  |
| H | 3.00851400  | -1.46451700 | -1.85158800 |
| H | 4.15080500  | -2.51503100 | -0.98938600 |
| H | 2.43831700  | -2.52446100 | -0.53394300 |
| H | 4.03097200  | -0.62270600 | 2.25254700  |
| H | 2.99916700  | -2.01409000 | 1.85234500  |
| H | 4.72907900  | -2.04851200 | 1.45140600  |

### 3a

|   |             |             |             |
|---|-------------|-------------|-------------|
| C | -2.79676500 | 0.33771500  | 0.54851500  |
| C | -2.64467000 | -1.83709900 | -0.28806300 |
| C | -1.22381500 | -1.32180600 | -0.26111000 |



|   |             |             |             |
|---|-------------|-------------|-------------|
| C | -0.46316200 | -1.96199300 | 0.90332500  |
| H | -0.24479400 | -3.00856100 | 0.66426500  |
| H | 0.47706500  | -1.43098800 | 1.06480500  |
| H | -1.03443800 | -1.94046100 | 1.83520800  |
| C | -0.52080000 | -1.58915500 | -1.59184000 |
| H | 0.48161100  | -1.15067300 | -1.59697100 |
| H | -0.41311700 | -2.66606500 | -1.76381400 |
| H | -1.09373000 | -1.15025900 | -2.41315700 |
| C | -2.72834900 | 0.45396700  | 2.07170200  |
| H | -2.15650000 | 1.34142300  | 2.34944700  |
| H | -3.74499100 | 0.54513700  | 2.46373800  |
| H | -2.25655500 | -0.41715200 | 2.53070000  |
| C | -3.51028800 | 1.53947900  | -0.05068200 |
| H | -4.52482200 | 1.61385000  | 0.35229500  |
| H | -2.96796600 | 2.45367600  | 0.21002000  |
| H | -3.55480500 | 1.44603600  | -1.13809000 |
| N | -1.47997900 | 0.13750800  | -0.12442500 |
| O | -3.49803100 | -1.17330300 | -1.17203900 |
| N | -3.56565400 | -0.89577700 | 0.27485800  |
| O | -0.48095700 | 0.80056500  | 0.60893000  |
| C | 0.38663000  | 1.63755500  | -0.17807000 |
| C | 1.64900000  | 0.85128700  | -0.58530700 |
| C | -0.27406400 | 2.22491800  | -1.41370900 |
| C | 0.82493900  | 2.73153800  | 0.79717400  |
| O | 2.15589900  | 0.92102700  | -1.68346700 |
| O | 2.13078700  | 0.14500000  | 0.43793900  |
| H | -0.53873300 | 1.45308400  | -2.13742400 |
| H | -1.18040900 | 2.76101200  | -1.12349000 |
| H | 0.41888100  | 2.92551700  | -1.88595100 |
| H | 1.60386200  | 3.35688200  | 0.34967900  |
| H | -0.03790300 | 3.35956000  | 1.03981500  |
| H | 1.21133100  | 2.28418400  | 1.71642000  |
| C | 3.38108000  | -0.60958300 | 0.32897100  |
| C | 4.53460900  | 0.33312400  | -0.00275700 |
| C | 3.22933000  | -1.72774300 | -0.69798900 |
| C | 3.55116800  | -1.18767700 | 1.72933700  |
| H | 5.47954500  | -0.20919000 | 0.10474400  |
| H | 4.46396900  | 0.71463300  | -1.02221200 |
| H | 4.54389700  | 1.17608100  | 0.69659200  |
| H | 3.09700900  | -1.33153000 | -1.70673800 |
| H | 4.13004100  | -2.35020900 | -0.68292700 |
| H | 2.37298000  | -2.36240900 | -0.44477000 |
| H | 3.61776100  | -0.38469000 | 2.46972800  |
| H | 2.70388800  | -1.83070400 | 1.98715200  |
| H | 4.46725400  | -1.78408800 | 1.77556600  |
| H | -2.83152300 | -2.89969700 | -0.13556500 |

#### 4a

|   |             |             |             |
|---|-------------|-------------|-------------|
| C | -2.58497300 | 0.79862300  | 0.55194300  |
| C | -2.69788100 | -1.39796800 | -0.25989300 |
| C | -1.21735200 | -1.04205100 | -0.23106600 |
| C | -3.15408600 | -2.81507800 | -0.07105500 |

|   |             |             |             |
|---|-------------|-------------|-------------|
| H | -2.72603800 | -3.45804600 | -0.84749900 |
| H | -2.84843000 | -3.19751300 | 0.90648500  |
| H | -4.24281600 | -2.84493300 | -0.14454800 |
| C | -0.50420100 | -1.73380000 | 0.93488000  |
| H | -0.37276200 | -2.79778900 | 0.70887400  |
| H | 0.47721500  | -1.27866500 | 1.08218600  |
| H | -1.06106000 | -1.65330800 | 1.87261200  |
| C | -0.55372900 | -1.39694600 | -1.56275500 |
| H | 0.48258300  | -1.04634500 | -1.58688400 |
| H | -0.53888900 | -2.48219900 | -1.71632100 |
| H | -1.09614000 | -0.92514500 | -2.38653700 |
| C | -2.50876400 | 0.90654100  | 2.07543700  |
| H | -1.82350000 | 1.70815700  | 2.35784300  |
| H | -3.50647500 | 1.13066800  | 2.46263700  |
| H | -2.16094100 | -0.02094500 | 2.53519100  |
| C | -3.14434700 | 2.07759300  | -0.05178800 |
| H | -4.14578800 | 2.27176200  | 0.34387100  |
| H | -2.49889900 | 2.92166600  | 0.21142700  |
| H | -3.19345400 | 1.98572900  | -1.13916900 |
| N | -1.30186200 | 0.43912600  | -0.11554800 |
| O | -3.42822600 | -0.62203400 | -1.17061900 |
| N | -3.49400700 | -0.32902700 | 0.27311600  |
| O | -0.23209300 | 0.99522500  | 0.60705200  |
| C | 0.71862800  | 1.72241400  | -0.19168100 |
| C | 1.88872000  | 0.80160700  | -0.59056500 |
| C | 0.12531000  | 2.35968800  | -1.43678900 |
| C | 1.27458800  | 2.77498300  | 0.76925200  |
| O | 2.39765900  | 0.80231300  | -1.68824200 |
| O | 2.29697400  | 0.05941900  | 0.44294200  |
| H | -0.22930100 | 1.60916800  | -2.14398400 |
| H | -0.71246600 | 3.00190400  | -1.15619800 |
| H | 0.89380300  | 2.96378700  | -1.92505300 |
| H | 2.11567900  | 3.30704500  | 0.31335300  |
| H | 0.48516900  | 3.49538600  | 1.00520800  |
| H | 1.61122600  | 2.29892800  | 1.69366600  |
| C | 3.45255600  | -0.82840200 | 0.32986200  |
| C | 4.70257900  | -0.01998400 | -0.00878200 |
| C | 3.17487800  | -1.92459800 | -0.69526600 |
| C | 3.56348300  | -1.42112600 | 1.73030100  |
| H | 5.58277100  | -0.66436200 | 0.08630400  |
| H | 4.66402300  | 0.37373400  | -1.02541500 |
| H | 4.81248100  | 0.81245400  | 0.69467100  |
| H | 3.08933200  | -1.51732700 | -1.70456800 |
| H | 3.99749900  | -2.64735700 | -0.67788300 |
| H | 2.25043100  | -2.45498100 | -0.44129100 |
| H | 3.71704500  | -0.62942600 | 2.46988300  |
| H | 2.65190100  | -1.96793400 | 1.99082600  |
| H | 4.40991900  | -2.11317300 | 1.77606400  |

### 3a-1a<sup>TS</sup>

|   |            |             |            |
|---|------------|-------------|------------|
| C | 1.21805200 | -1.32831100 | 0.24597800 |
| C | 3.44793400 | -0.78704800 | 0.23865200 |

|   |             |             |             |
|---|-------------|-------------|-------------|
| C | 2.78446000  | 0.54121700  | 0.15776900  |
| C | 3.24518600  | 1.43315300  | 1.31938400  |
| H | 4.33804200  | 1.49777300  | 1.33831800  |
| H | 2.84720300  | 2.44275700  | 1.19632000  |
| H | 2.89432400  | 1.03220600  | 2.27442400  |
| C | 3.17094700  | 1.15845300  | -1.19915000 |
| H | 2.67651500  | 2.12623400  | -1.31249700 |
| H | 4.25399400  | 1.30870800  | -1.22794100 |
| H | 2.87654500  | 0.50924300  | -2.02614800 |
| C | 0.61044000  | -1.74823200 | 1.57811400  |
| H | -0.37748200 | -1.29495300 | 1.69436400  |
| H | 0.52409000  | -2.83794700 | 1.63329500  |
| H | 1.24136000  | -1.40012000 | 2.40245400  |
| C | 0.46226100  | -1.88473400 | -0.94592000 |
| H | 0.50621100  | -2.97600600 | -0.89440700 |
| H | -0.57679000 | -1.55503300 | -0.91578300 |
| H | 0.91795300  | -1.56258100 | -1.88248700 |
| N | 1.34045700  | 0.18223800  | 0.26741100  |
| O | 3.19600400  | -2.31319500 | -1.00307500 |
| N | 2.62660000  | -1.80918900 | 0.22451400  |
| O | 0.60051400  | 0.76022200  | -0.78381100 |
| C | -0.40941000 | 1.67248800  | -0.32083200 |
| C | -1.54064000 | 0.90036500  | 0.39343800  |
| C | 0.14836500  | 2.73053600  | 0.61612700  |
| C | -0.94437700 | 2.29329300  | -1.60798600 |
| O | -1.82795200 | 1.05560900  | 1.55906900  |
| O | -2.17207100 | 0.08145500  | -0.44890400 |
| H | 0.50915200  | 2.28352200  | 1.54326600  |
| H | 0.96403400  | 3.26068100  | 0.11419900  |
| H | -0.63383500 | 3.45287700  | 0.86551500  |
| H | -1.80101000 | 2.93870800  | -1.38959300 |
| H | -0.15822500 | 2.89772300  | -2.07010300 |
| H | -1.25696600 | 1.51460300  | -2.30628900 |
| C | -3.39524300 | -0.63092400 | -0.06932300 |
| C | -4.46933900 | 0.37504500  | 0.33498400  |
| C | -3.10800100 | -1.64342300 | 1.03438200  |
| C | -3.78341200 | -1.34148600 | -1.36076700 |
| H | -5.42501000 | -0.14772700 | 0.44306500  |
| H | -4.22965600 | 0.86223800  | 1.28157000  |
| H | -4.58352600 | 1.13719000  | -0.44342000 |
| H | -2.81177300 | -1.15132700 | 1.96284600  |
| H | -4.01495000 | -2.22728100 | 1.22316700  |
| H | -2.31880700 | -2.33593000 | 0.72314000  |
| H | -3.96213800 | -0.61494300 | -2.15927200 |
| H | -2.98729800 | -2.02154500 | -1.67944400 |
| H | -4.69689400 | -1.92308700 | -1.20491700 |
| H | 4.52025300  | -0.94241300 | 0.29754400  |

#### 4a-2a<sup>TS</sup>

|   |            |             |            |
|---|------------|-------------|------------|
| C | 1.08184200 | -1.09975100 | 0.44087000 |
| C | 3.31170000 | -0.51198000 | 0.21623500 |

|   |             |             |             |
|---|-------------|-------------|-------------|
| C | 2.55587400  | 0.65325300  | -0.34722600 |
| C | 3.07459100  | 2.01349300  | 0.11285300  |
| H | 4.11115500  | 2.16201800  | -0.20517500 |
| H | 2.46851300  | 2.79962600  | -0.34826900 |
| H | 3.01000900  | 2.11086500  | 1.20031800  |
| C | 2.64585600  | 0.55262700  | -1.88794700 |
| H | 1.94130400  | 1.26465700  | -2.32423600 |
| H | 3.65879600  | 0.81307300  | -2.20871400 |
| H | 2.41911300  | -0.45226400 | -2.24561100 |
| C | 0.37306900  | -1.32889000 | 1.77008500  |
| H | -0.64744600 | -0.93517200 | 1.73999100  |
| H | 0.32560800  | -2.39995400 | 1.99055000  |
| H | 0.91600500  | -0.82308100 | 2.57334800  |
| C | 0.40172000  | -1.85811100 | -0.68873200 |
| H | 0.40591600  | -2.92407700 | -0.44798100 |
| H | -0.62530000 | -1.50255800 | -0.78339700 |
| H | 0.91482000  | -1.72566900 | -1.64012400 |
| N | 1.21662000  | 0.37962900  | 0.22222100  |
| O | 3.07180700  | -2.38868600 | -0.39571200 |
| N | 2.50874000  | -1.49759700 | 0.59747100  |
| O | 0.22224100  | 0.88851100  | -0.62934400 |
| C | -0.76158200 | 1.71587900  | 0.02289500  |
| C | -1.95450900 | 0.85902100  | 0.49654800  |
| C | -0.21672600 | 2.51914000  | 1.19160800  |
| C | -1.26606300 | 2.62653100  | -1.09700100 |
| O | -2.47690300 | 0.98596700  | 1.58227200  |
| O | -2.36112600 | 0.02410300  | -0.45797800 |
| H | 0.11285900  | 1.87288600  | 2.00617500  |
| H | 0.62438800  | 3.13017700  | 0.85675300  |
| H | -1.00409500 | 3.17762200  | 1.56599000  |
| H | -2.12176000 | 3.21690700  | -0.75448000 |
| H | -0.46284000 | 3.30758500  | -1.39466500 |
| H | -1.56860400 | 2.02976900  | -1.96084500 |
| C | -3.54548900 | -0.82215300 | -0.28546900 |
| C | -4.77749100 | 0.04962900  | -0.05871300 |
| C | -3.32102100 | -1.81772300 | 0.84877200  |
| C | -3.64172500 | -1.54606800 | -1.62341500 |
| H | -5.67317800 | -0.57677700 | -0.12114600 |
| H | -4.75596400 | 0.53275500  | 0.91924400  |
| H | -4.84340800 | 0.81691500  | -0.83764400 |
| H | -3.23960600 | -1.31528000 | 1.81461100  |
| H | -4.16896800 | -2.50950400 | 0.88586200  |
| H | -2.41324500 | -2.40370700 | 0.66910500  |
| H | -3.76678500 | -0.82800500 | -2.43960300 |
| H | -2.73777600 | -2.13368200 | -1.81071200 |
| H | -4.50144600 | -2.22270400 | -1.61678700 |
| C | 4.78194000  | -0.53316100 | 0.39943100  |
| H | 5.06469900  | 0.29355900  | 1.06391200  |
| H | 5.09443000  | -1.48798500 | 0.81698300  |
| H | 5.28522700  | -0.37181800 | -0.55995700 |

## 5.2 OPTIMIZED GEOMETRIES IN GAS PHASE

### *3a (cis-isomer 1)*

|   |             |             |             |
|---|-------------|-------------|-------------|
| C | 1.18388000  | -1.40574300 | 0.15789400  |
| C | 3.46046000  | -0.93609300 | -0.08718600 |
| C | 2.81412100  | 0.40951500  | 0.18135400  |
| C | 3.26557200  | 0.92253400  | 1.55161700  |
| H | 4.35522000  | 1.03894000  | 1.57846000  |
| H | 2.81382100  | 1.89519800  | 1.76146800  |
| H | 2.96951300  | 0.23007300  | 2.34603500  |
| C | 3.20124700  | 1.38697800  | -0.92643300 |
| H | 2.75044400  | 2.36846400  | -0.76406200 |
| H | 4.29016200  | 1.50900600  | -0.92127700 |
| H | 2.88867400  | 1.01533500  | -1.90351000 |
| C | 0.69876700  | -1.88884800 | 1.52337000  |
| H | -0.25090700 | -1.40254600 | 1.76204000  |
| H | 0.56954300  | -2.97521700 | 1.52480800  |
| H | 1.41885100  | -1.62049000 | 2.30319400  |
| C | 0.28933900  | -1.88803600 | -0.97337500 |
| H | 0.25625800  | -2.98127000 | -0.93426000 |
| H | -0.71958900 | -1.49020200 | -0.87347900 |
| H | 0.69112900  | -1.57481500 | -1.93798600 |
| N | 1.35625200  | 0.07912800  | 0.21661300  |
| O | 3.07361900  | -1.51857800 | -1.29080900 |
| N | 2.52946300  | -2.01342400 | -0.01507100 |
| O | 0.63482500  | 0.73795400  | -0.79752700 |
| C | -0.34639500 | 1.64963700  | -0.27178000 |
| C | -1.49235500 | 0.86994900  | 0.41351200  |
| C | 0.23536300  | 2.62690500  | 0.73809300  |
| C | -0.86471900 | 2.36546200  | -1.51442400 |
| O | -1.71084700 | 0.90836000  | 1.60227900  |
| O | -2.22027900 | 0.18273900  | -0.47235000 |
| H | 0.57560600  | 2.10219700  | 1.63091500  |
| H | 1.06501600  | 3.17659700  | 0.28508000  |
| H | -0.53334200 | 3.34436000  | 1.03969600  |
| H | -1.69766600 | 3.02657500  | -1.25490600 |
| H | -0.05746800 | 2.96673800  | -1.94331800 |
| H | -1.20590200 | 1.64129100  | -2.25657100 |
| C | -3.42927900 | -0.53805200 | -0.07405900 |
| C | -4.45949100 | 0.45574600  | 0.45593000  |
| C | -3.11180900 | -1.62968800 | 0.94548100  |
| C | -3.89866200 | -1.15453900 | -1.38702000 |
| H | -5.41300000 | -0.06039700 | 0.60858500  |
| H | -4.14268300 | 0.89064100  | 1.40571600  |
| H | -4.61809300 | 1.25789800  | -0.27266600 |
| H | -2.79295800 | -1.20829400 | 1.90004900  |
| H | -4.01378400 | -2.22875800 | 1.11035800  |
| H | -2.32975200 | -2.29612400 | 0.56712800  |
| H | -4.09059900 | -0.37383700 | -2.12929600 |
| H | -3.13772500 | -1.83305900 | -1.78544000 |
| H | -4.82131600 | -1.72024600 | -1.22568600 |

|                            |             |             |             |
|----------------------------|-------------|-------------|-------------|
| H                          | 4.48576500  | -1.11615000 | 0.23755400  |
| <i>3a (trans-isomer 2)</i> |             |             |             |
| C                          | -2.80065900 | 0.34083100  | 0.53732300  |
| C                          | -2.64073000 | -1.84119100 | -0.27269400 |
| C                          | -1.22080200 | -1.32248900 | -0.25010500 |
| C                          | -0.45924600 | -1.94940800 | 0.92106500  |
| H                          | -0.23563000 | -2.99745200 | 0.69199400  |
| H                          | 0.47748300  | -1.41225600 | 1.08295200  |
| H                          | -1.03438400 | -1.92227600 | 1.85067500  |
| C                          | -0.51922500 | -1.59845300 | -1.57991800 |
| H                          | 0.47936700  | -1.15179900 | -1.59556200 |
| H                          | -0.40450600 | -2.67643400 | -1.74240200 |
| H                          | -1.10025700 | -1.17258900 | -2.40232700 |
| C                          | -2.73847600 | 0.48081900  | 2.05854000  |
| H                          | -2.17532400 | 1.37674600  | 2.32669700  |
| H                          | -3.75785300 | 0.56553000  | 2.44474500  |
| H                          | -2.25946800 | -0.37926800 | 2.53093600  |
| C                          | -3.51731700 | 1.52893300  | -0.08518000 |
| H                          | -4.53684600 | 1.59835800  | 0.30586700  |
| H                          | -2.98603000 | 2.45167200  | 0.16843200  |
| H                          | -3.54993300 | 1.41828700  | -1.17135900 |
| N                          | -1.47861300 | 0.13741200  | -0.12543200 |
| O                          | -3.49428400 | -1.19110900 | -1.16314300 |
| N                          | -3.56502700 | -0.89803500 | 0.27964100  |
| O                          | -0.48451400 | 0.80429300  | 0.61184300  |
| C                          | 0.38691300  | 1.63732700  | -0.17359000 |
| C                          | 1.64608100  | 0.84798600  | -0.58364900 |
| C                          | -0.26949100 | 2.22872900  | -1.40953100 |
| C                          | 0.82975200  | 2.72647800  | 0.80493500  |
| O                          | 2.14816200  | 0.91104100  | -1.68259700 |
| O                          | 2.13332700  | 0.14470100  | 0.44282500  |
| H                          | -0.54540300 | 1.45654000  | -2.12836800 |
| H                          | -1.16874100 | 2.77701300  | -1.11946300 |
| H                          | 0.43185800  | 2.91651800  | -1.88808400 |
| H                          | 1.61208700  | 3.34941600  | 0.35966200  |
| H                          | -0.02995400 | 3.35808000  | 1.04950800  |
| H                          | 1.21261100  | 2.27341700  | 1.72283200  |
| C                          | 3.38141800  | -0.60720700 | 0.32424700  |
| C                          | 4.53219400  | 0.33674800  | -0.01541600 |
| C                          | 3.22569300  | -1.72479000 | -0.70337400 |
| C                          | 3.56221400  | -1.18705300 | 1.72277100  |
| H                          | 5.47910300  | -0.20489400 | 0.07935200  |
| H                          | 4.44932500  | 0.72334300  | -1.03208800 |
| H                          | 4.54860900  | 1.17649200  | 0.68779900  |
| H                          | 3.08773200  | -1.32651300 | -1.71052800 |
| H                          | 4.12629300  | -2.34785600 | -0.69396200 |
| H                          | 2.37041100  | -2.35949000 | -0.44644200 |
| H                          | 3.63064900  | -0.38484800 | 2.46380500  |
| H                          | 2.71746100  | -1.83150900 | 1.98522000  |
| H                          | 4.47977100  | -1.78189000 | 1.76389300  |
| H                          | -2.82438300 | -2.90294900 | -0.10721800 |

*4a (cis-isomer 1)*

|   |             |             |             |
|---|-------------|-------------|-------------|
| C | 1.02704900  | -1.29773600 | 0.10390800  |
| C | 3.28596200  | -0.70788000 | -0.15800900 |
| C | 2.55821100  | 0.59979800  | 0.15401200  |
| C | 4.72261000  | -0.91718600 | 0.22771700  |
| H | 5.35452800  | -0.13112500 | -0.19917300 |
| H | 4.83839700  | -0.90530700 | 1.31486900  |
| H | 5.04949300  | -1.88520800 | -0.15614400 |
| C | 2.97153600  | 1.13510400  | 1.52860400  |
| H | 4.03932700  | 1.37878100  | 1.54888600  |
| H | 2.41236300  | 2.04556600  | 1.75569700  |
| H | 2.76448300  | 0.40351800  | 2.31664300  |
| C | 2.87603600  | 1.62079800  | -0.93763100 |
| H | 2.36744200  | 2.56914200  | -0.75121400 |
| H | 3.95491300  | 1.81213700  | -0.93796500 |
| H | 2.57859300  | 1.25078600  | -1.91981000 |
| C | 0.60468200  | -1.83775900 | 1.46927300  |
| H | -0.36709200 | -1.41618700 | 1.74012200  |
| H | 0.54263200  | -2.92987000 | 1.44969600  |
| H | 1.32573400  | -1.54148500 | 2.23827200  |
| C | 0.12962900  | -1.80296900 | -1.01534600 |
| H | 0.15021900  | -2.89707000 | -0.99556500 |
| H | -0.89503000 | -1.45725500 | -0.88708500 |
| H | 0.49425000  | -1.45399600 | -1.98242200 |
| N | 1.11886600  | 0.19176000  | 0.19370900  |
| O | 2.87944300  | -1.24400500 | -1.38557500 |
| N | 2.39393300  | -1.82390700 | -0.12195900 |
| O | 0.35542900  | 0.82849100  | -0.80490900 |
| C | -0.67622100 | 1.67146500  | -0.26190500 |
| C | -1.76495100 | 0.81623000  | 0.42760700  |
| C | -0.14954400 | 2.67334900  | 0.75420800  |
| C | -1.24651600 | 2.36616400  | -1.49357100 |
| O | -1.95117600 | 0.80743200  | 1.62245700  |
| O | -2.48461200 | 0.12100100  | -0.45895700 |
| H | 0.22315400  | 2.16152900  | 1.64134800  |
| H | 0.64419800  | 3.27565000  | 0.30382300  |
| H | -0.95869800 | 3.34112600  | 1.06448500  |
| H | -2.11575600 | 2.97340800  | -1.22187000 |
| H | -0.47995000 | 3.01876200  | -1.92207400 |
| H | -1.54921000 | 1.62991400  | -2.24047400 |
| C | -3.64333600 | -0.67194800 | -0.04906400 |
| C | -4.70795300 | 0.25335000  | 0.53417500  |
| C | -3.24436200 | -1.77174200 | 0.93263400  |
| C | -4.11568100 | -1.27798300 | -1.36580800 |
| H | -5.62902200 | -0.31530100 | 0.69905600  |
| H | -4.38695900 | 0.68023700  | 1.48622300  |
| H | -4.92808700 | 1.06414100  | -0.16838000 |
| H | -2.92373300 | -1.35908700 | 1.89031400  |
| H | -4.11025200 | -2.42067800 | 1.10245000  |

|   |             |             |             |
|---|-------------|-------------|-------------|
| H | -2.43894400 | -2.38710600 | 0.51859400  |
| H | -4.36765300 | -0.48943300 | -2.08136400 |
| H | -3.33137400 | -1.90492200 | -1.80169400 |
| H | -5.00313600 | -1.89532300 | -1.19645900 |

*4a (trans-isomer 2)*

|   |             |             |             |
|---|-------------|-------------|-------------|
| C | -2.58497300 | 0.79862300  | 0.55194300  |
| C | -2.69788100 | -1.39796800 | -0.25989300 |
| C | -1.21735200 | -1.04205100 | -0.23106600 |
| C | -3.15408600 | -2.81507800 | -0.07105500 |
| H | -2.72603800 | -3.45804600 | -0.84749900 |
| H | -2.84843000 | -3.19751300 | 0.90648500  |
| H | -4.24281600 | -2.84493300 | -0.14454800 |
| C | -0.50420100 | -1.73380000 | 0.93488000  |
| H | -0.37276200 | -2.79778900 | 0.70887400  |
| H | 0.47721500  | -1.27866500 | 1.08218600  |
| H | -1.06106000 | -1.65330800 | 1.87261200  |
| C | -0.55372900 | -1.39694600 | -1.56275500 |
| H | 0.48258300  | -1.04634500 | -1.58688400 |
| H | -0.53888900 | -2.48219900 | -1.71632100 |
| H | -1.09614000 | -0.92514500 | -2.38653700 |
| C | -2.50876400 | 0.90654100  | 2.07543700  |
| H | -1.82350000 | 1.70815700  | 2.35784300  |
| H | -3.50647500 | 1.13066800  | 2.46263700  |
| H | -2.16094100 | -0.02094500 | 2.53519100  |
| C | -3.14434700 | 2.07759300  | -0.05178800 |
| H | -4.14578800 | 2.27176200  | 0.34387100  |
| H | -2.49889900 | 2.92166600  | 0.21142700  |
| H | -3.19345400 | 1.98572900  | -1.13916900 |
| N | -1.30186200 | 0.43912600  | -0.11554800 |
| O | -3.42822600 | -0.62203400 | -1.17061900 |
| N | -3.49400700 | -0.32902700 | 0.27311600  |
| O | -0.23209300 | 0.99522500  | 0.60705200  |
| C | 0.71862800  | 1.72241400  | -0.19168100 |
| C | 1.88872000  | 0.80160700  | -0.59056500 |
| C | 0.12531000  | 2.35968800  | -1.43678900 |
| C | 1.27458800  | 2.77498300  | 0.76925200  |
| O | 2.39765900  | 0.80231300  | -1.68824200 |
| O | 2.29697400  | 0.05941900  | 0.44294200  |
| H | -0.22930100 | 1.60916800  | -2.14398400 |
| H | -0.71246600 | 3.00190400  | -1.15619800 |
| H | 0.89380300  | 2.96378700  | -1.92505300 |
| H | 2.11567900  | 3.30704500  | 0.31335300  |
| H | 0.48516900  | 3.49538600  | 1.00520800  |
| H | 1.61122600  | 2.29892800  | 1.69366600  |
| C | 3.45255600  | -0.82840200 | 0.32986200  |
| C | 4.70257900  | -0.01998400 | -0.00878200 |
| C | 3.17487800  | -1.92459800 | -0.69526600 |
| C | 3.56348300  | -1.42112600 | 1.73030100  |
| H | 5.58277100  | -0.66436200 | 0.08630400  |
| H | 4.66402300  | 0.37373400  | -1.02541500 |



|   |            |             |             |
|---|------------|-------------|-------------|
| H | 4.81248100 | 0.81245400  | 0.69467100  |
| H | 3.08933200 | -1.51732700 | -1.70456800 |
| H | 3.99749900 | -2.64735700 | -0.67788300 |
| H | 2.25043100 | -2.45498100 | -0.44129100 |
| H | 3.71704500 | -0.62942600 | 2.46988300  |
| H | 2.65190100 | -1.96793400 | 1.99082600  |
| H | 4.40991900 | -2.11317300 | 1.77606400  |
